# Supplementary material
Source: PubMed Central journal article supplement (PMC2827871)
Supplement: NIHMS176022-supplement-Analytical_Data.pdf [file NIHMS176022-supplement-Analytical_Data.pdf]

## Supporting Information B

### One Step Glycolate Aldol Formation: Three Component Coupling Reactions of Silylglyoxylates, Alkynes, and Aldehydes

David A. Nicewicz and Jeffrey S. Johnson\*

*Department of Chemistry, University of North Carolina at Chapel Hill,  
Chapel Hill, North Carolina 27599-3290*

jsj@unc.edu

#### Table of Contents (Spectra Listed in Numerical Order)

|                          |                |
|--------------------------|----------------|
| <b>Compounds 1a-1k</b>   | <b>S2-S9</b>   |
| <b>Compounds 4a-4e</b>   | <b>S9-S14</b>  |
| <b>Compounds 8-9</b>     | <b>S15-S16</b> |
| <b>Compounds 10a-10j</b> | <b>S17-S34</b> |
| <b>Compounds 12-15</b>   | <b>S35-S40</b> |

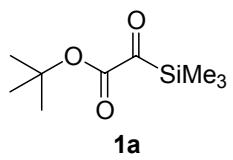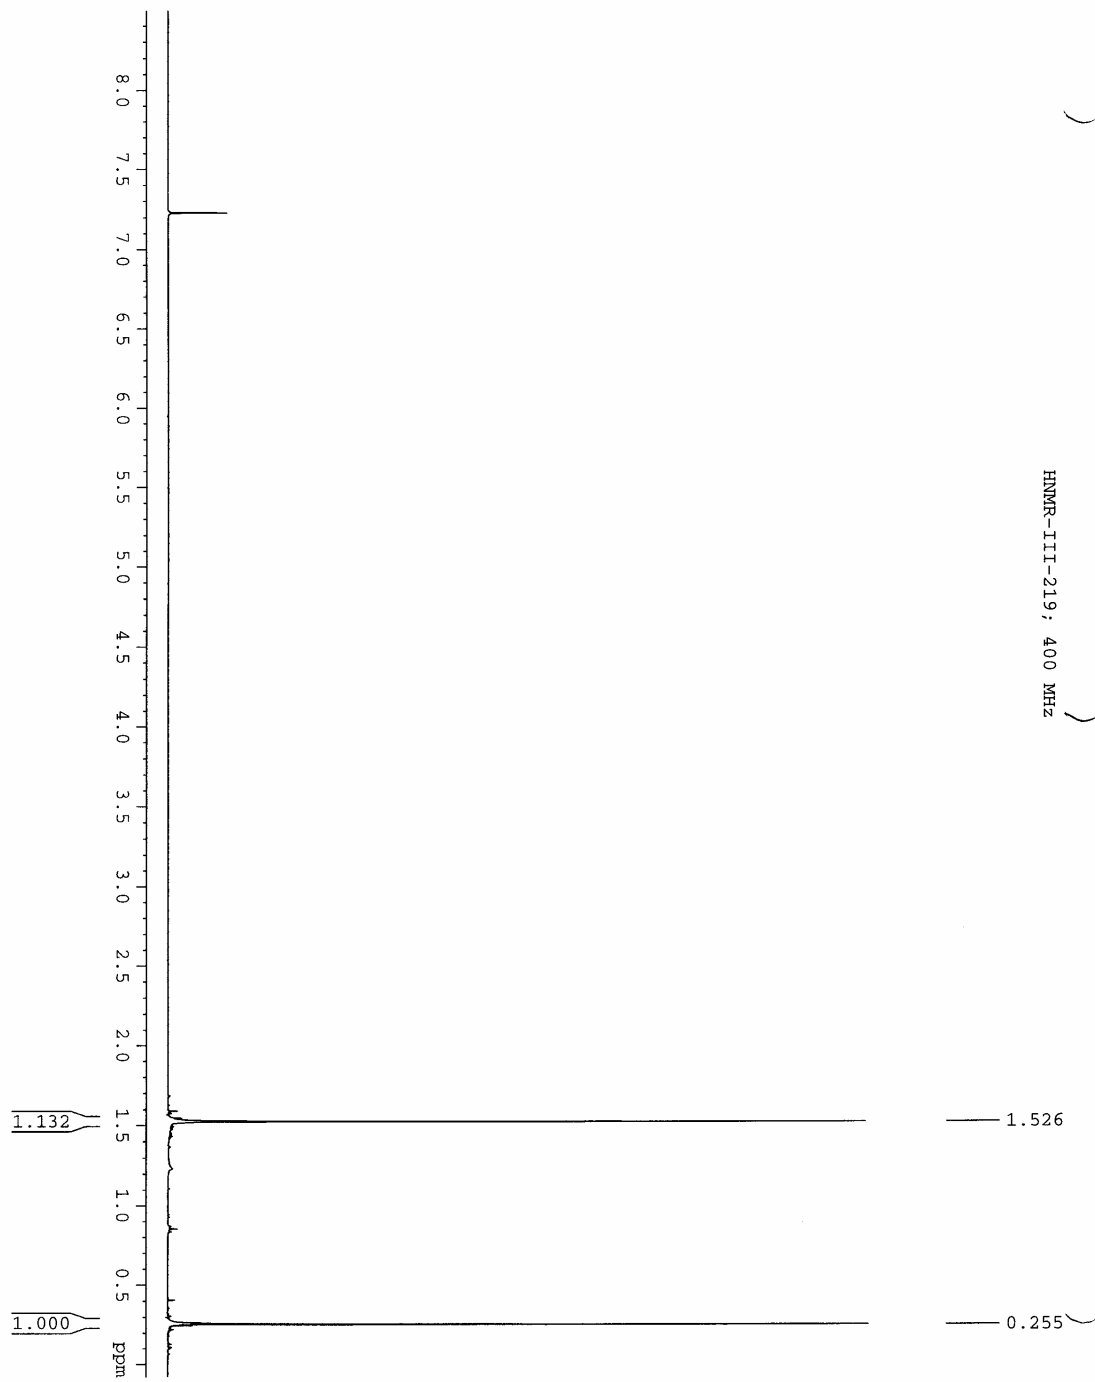

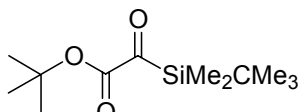

**1b**

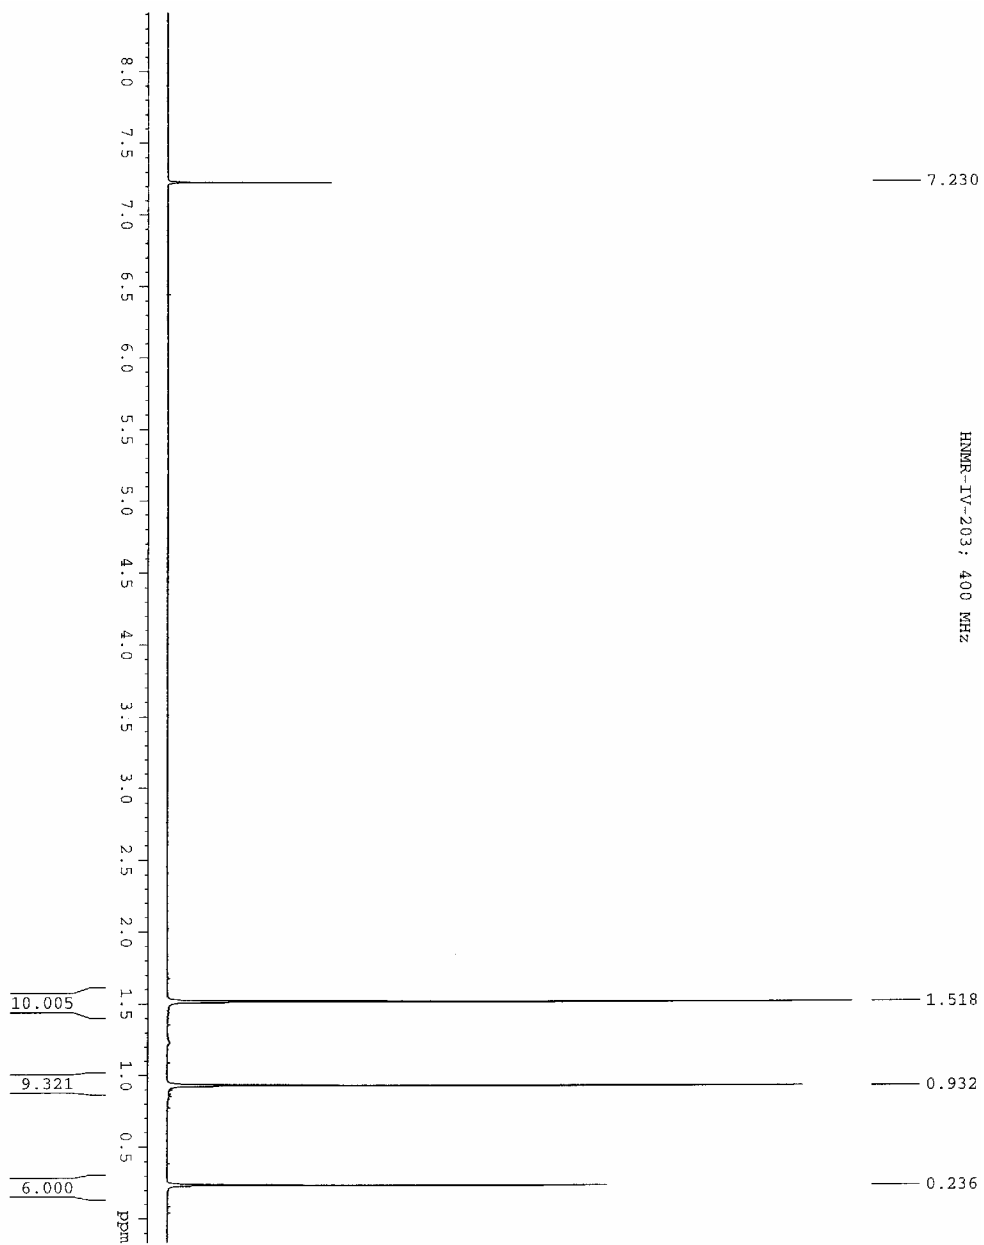

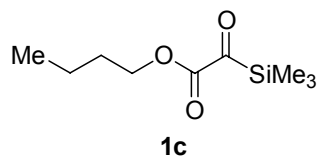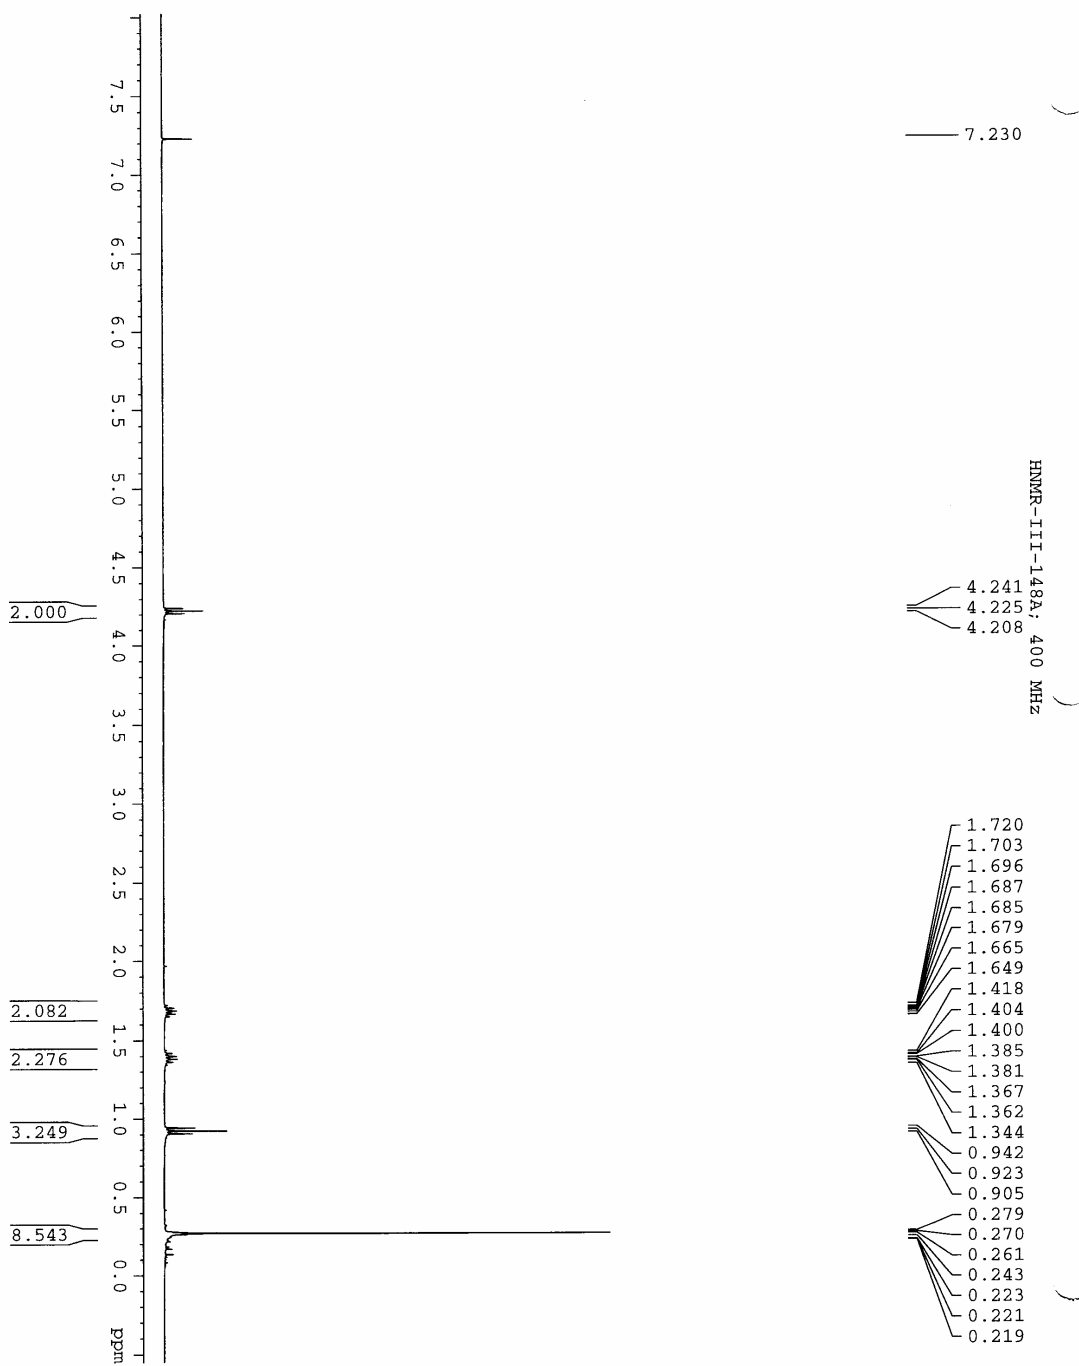

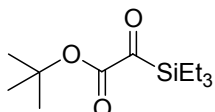

**1g**

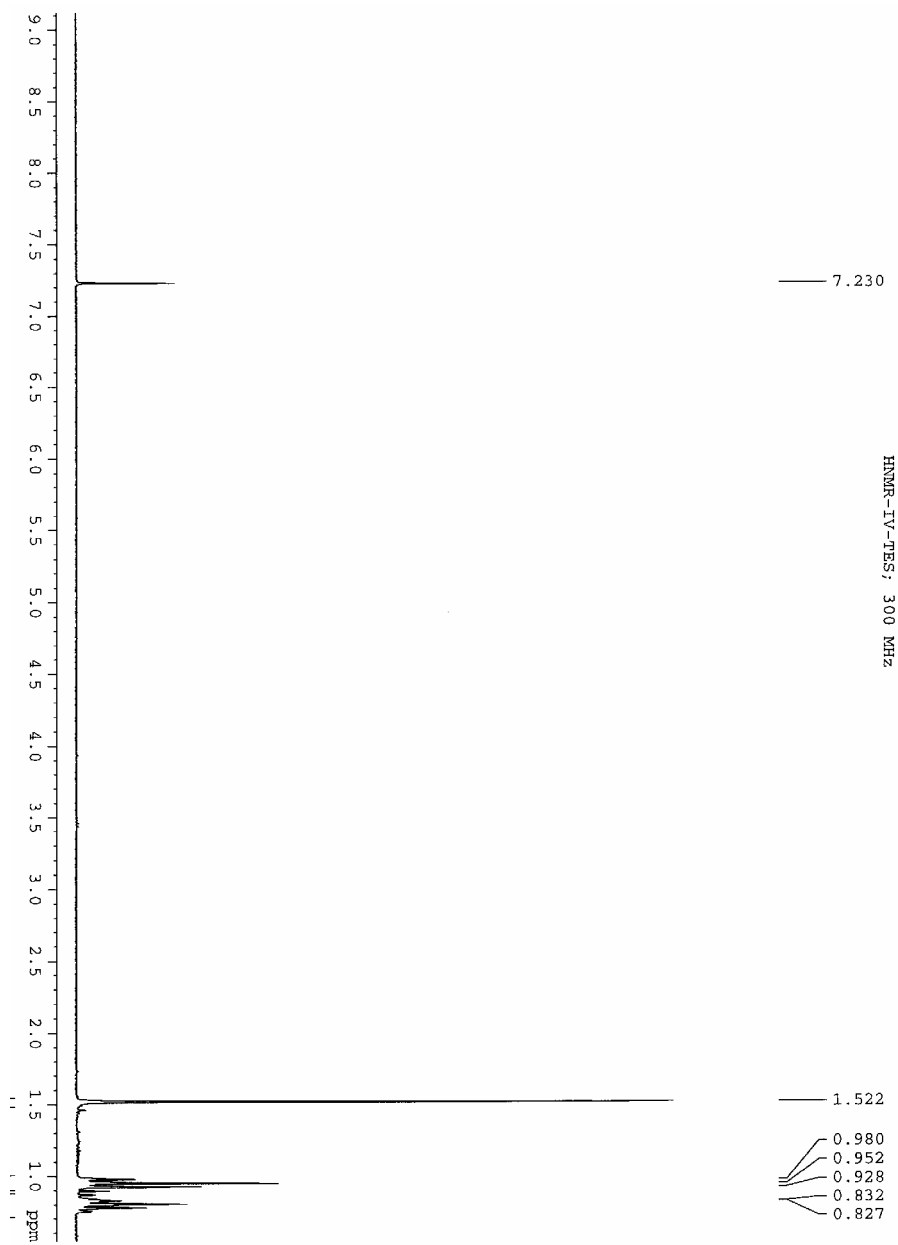

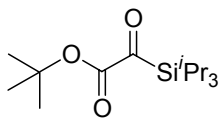

**1h**

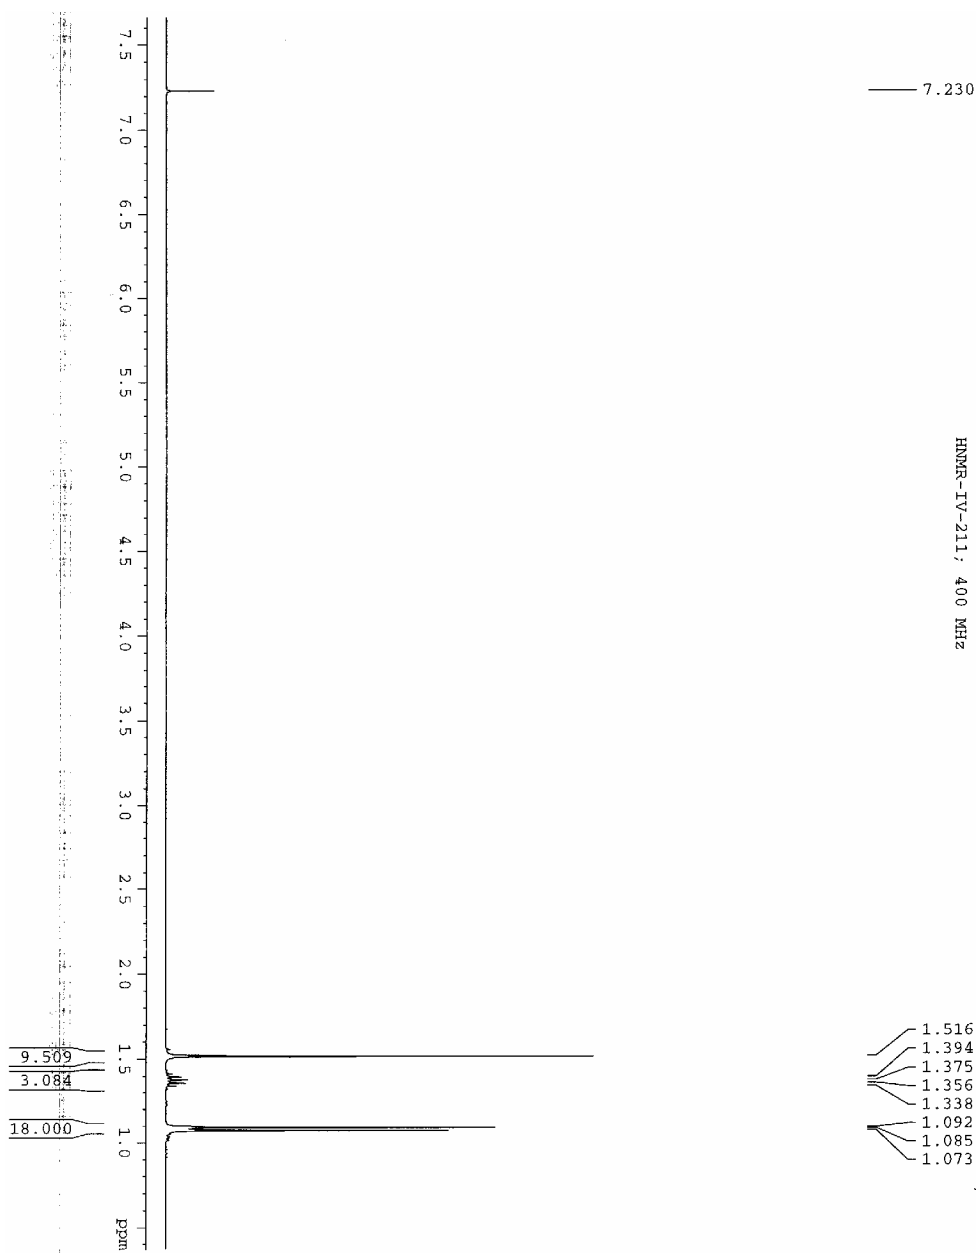

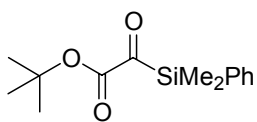

**1i**

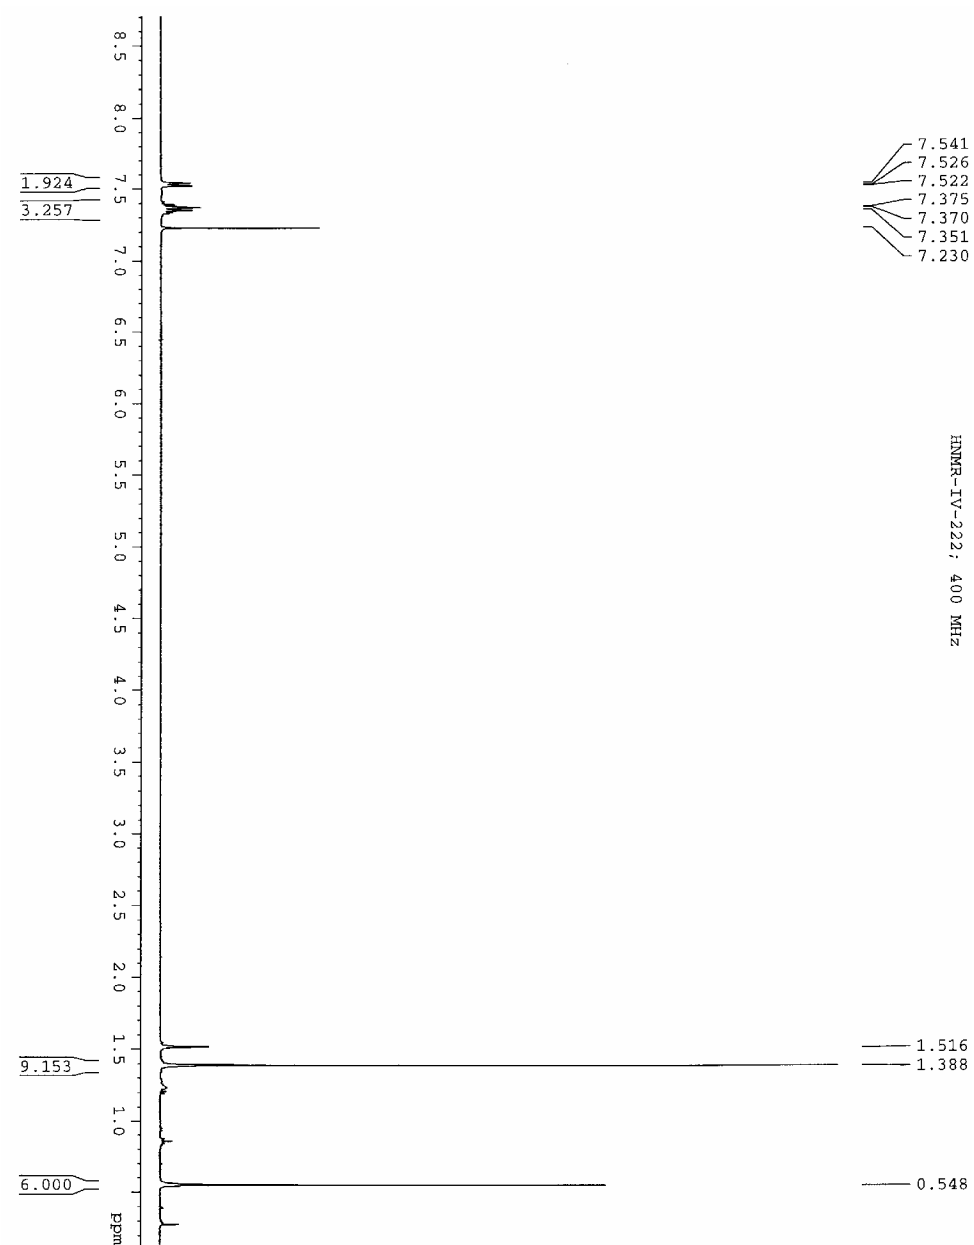

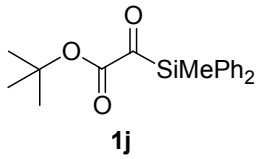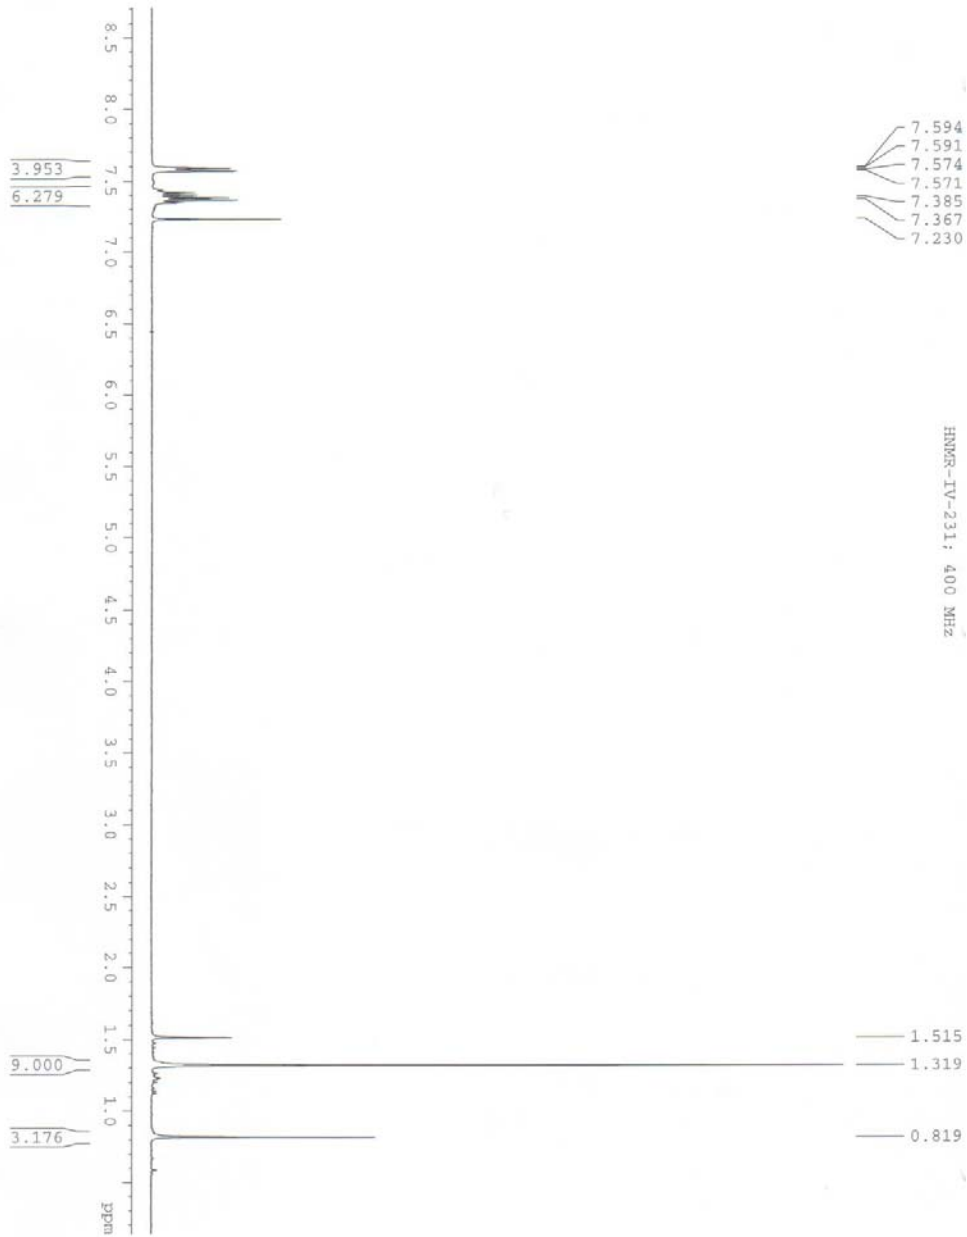



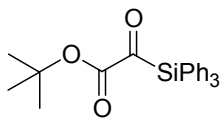

**1k**

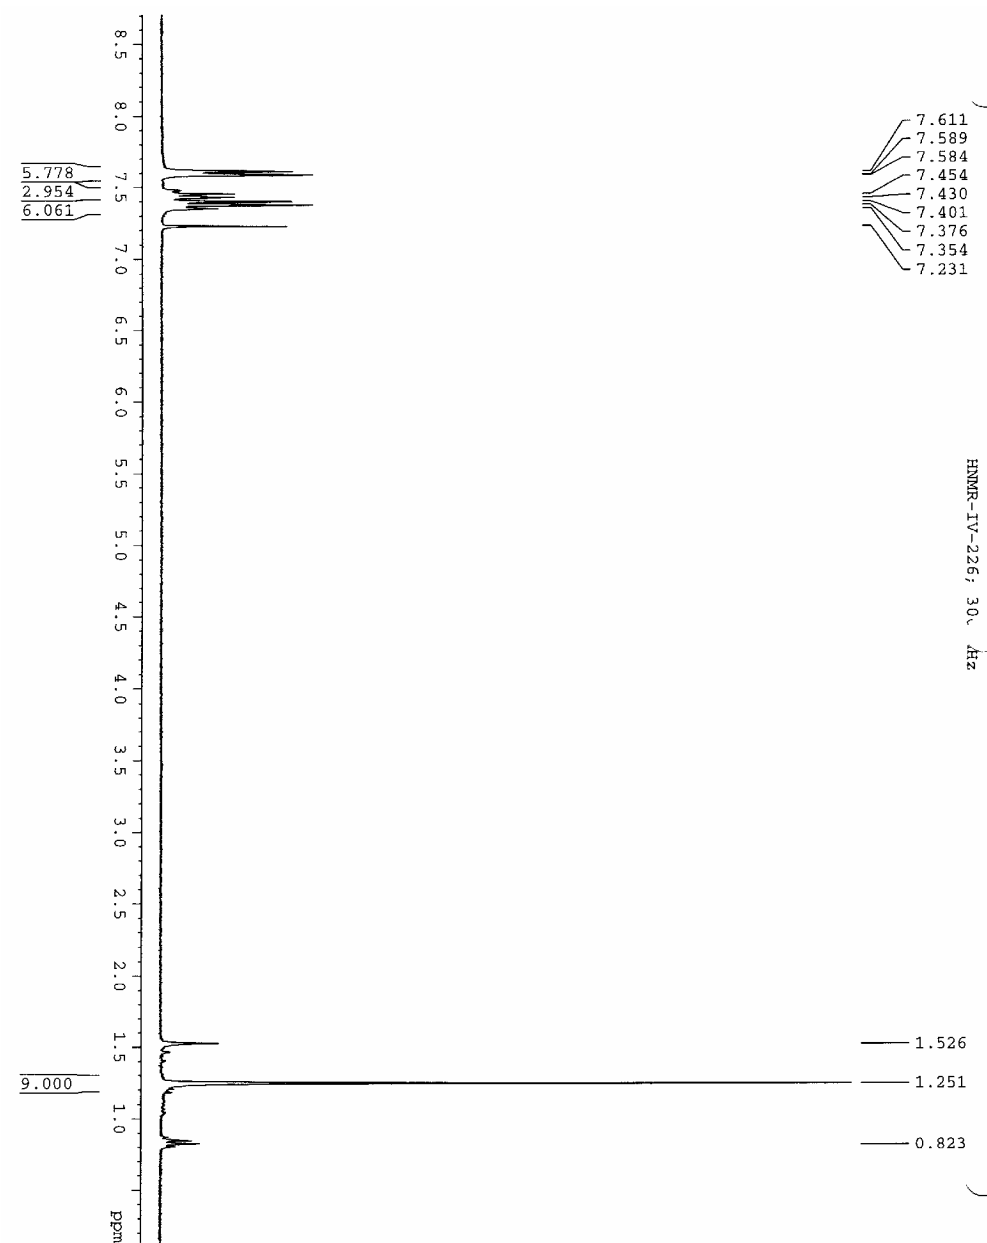

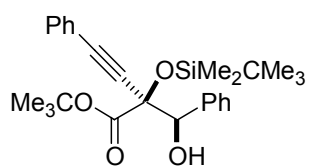

4a

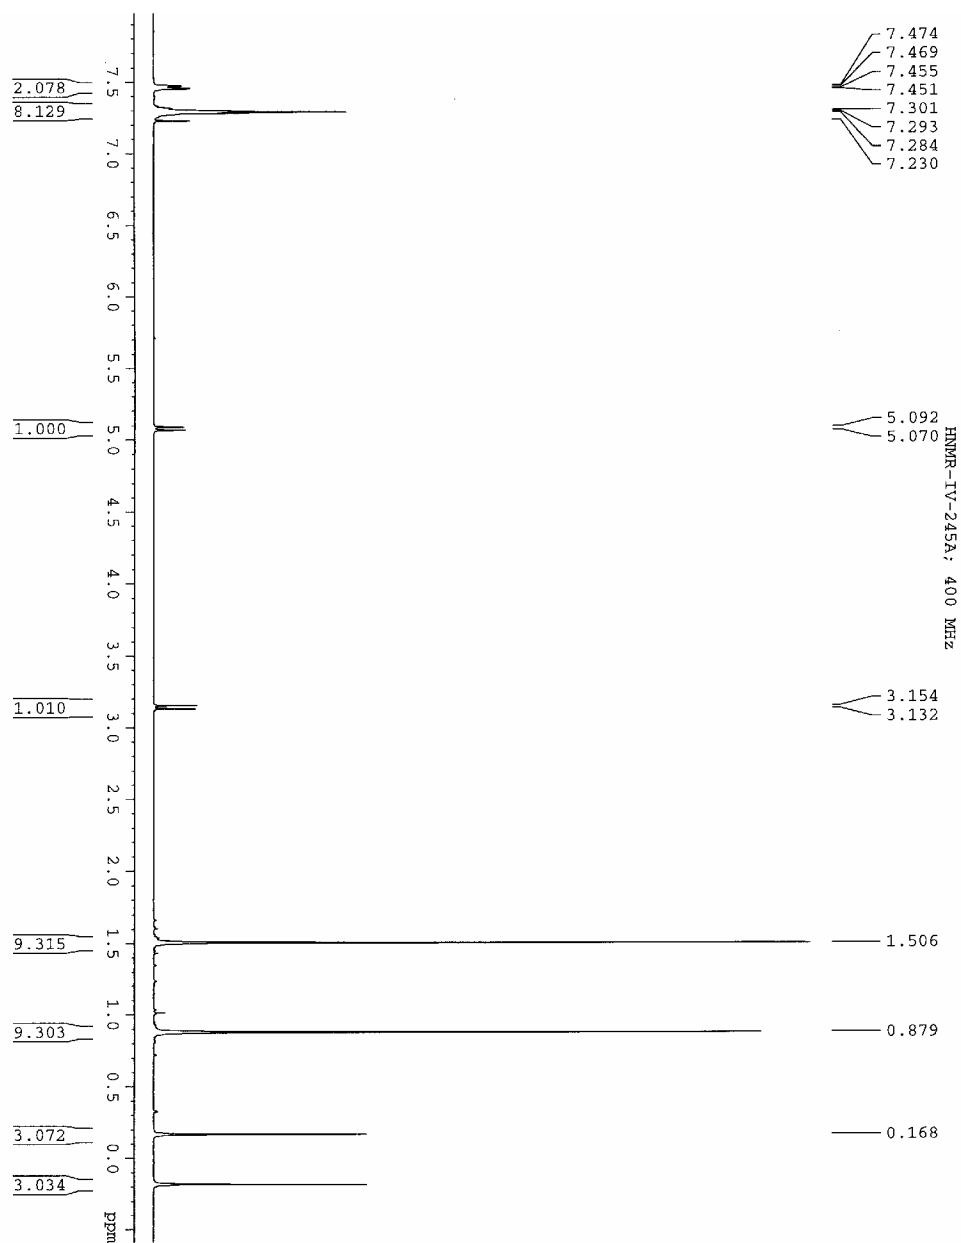

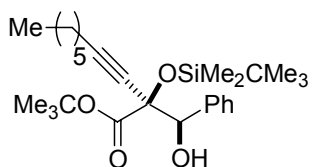

4b

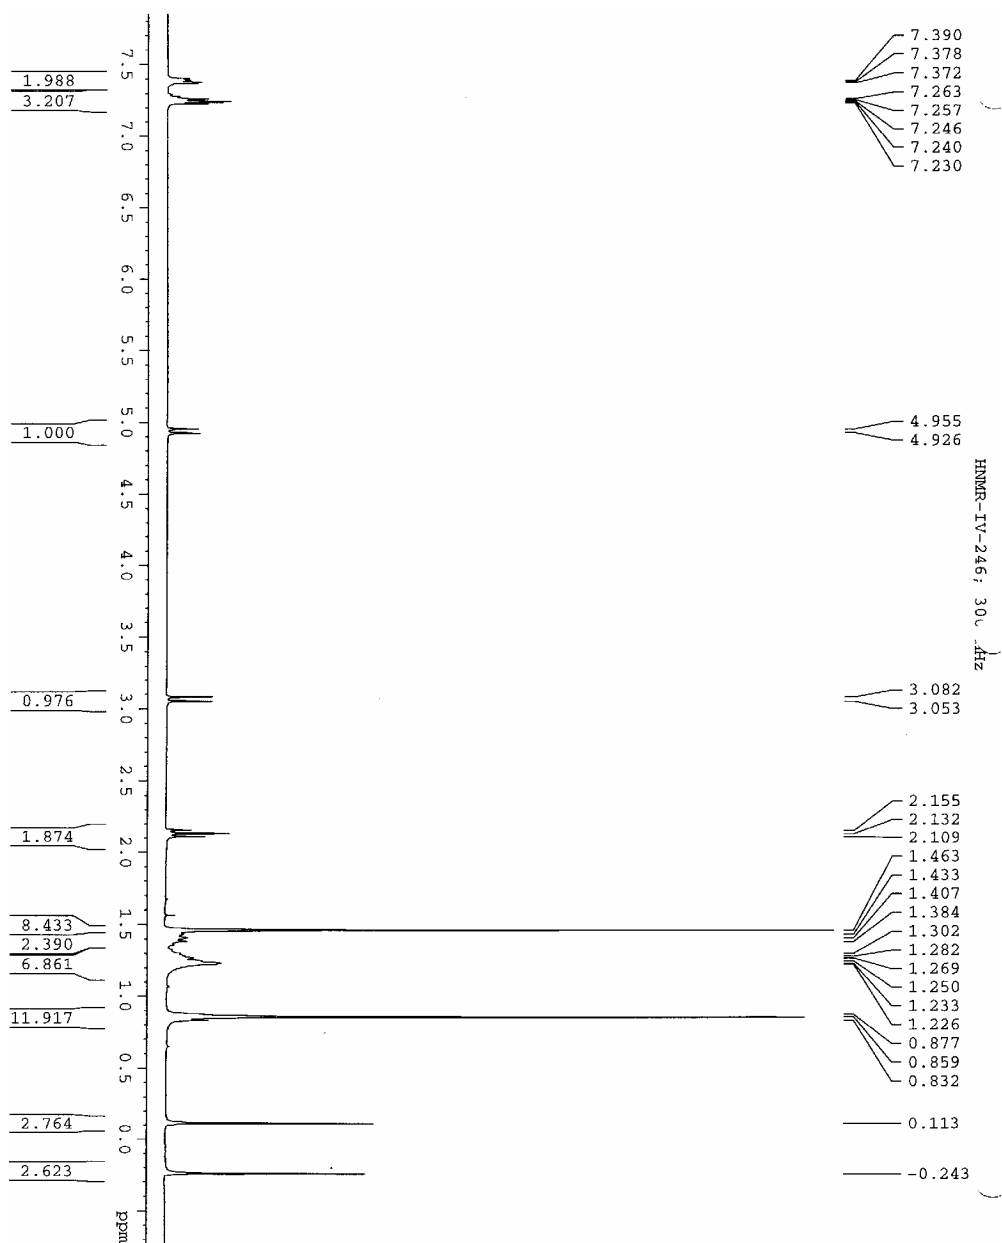

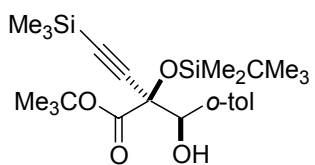

4c

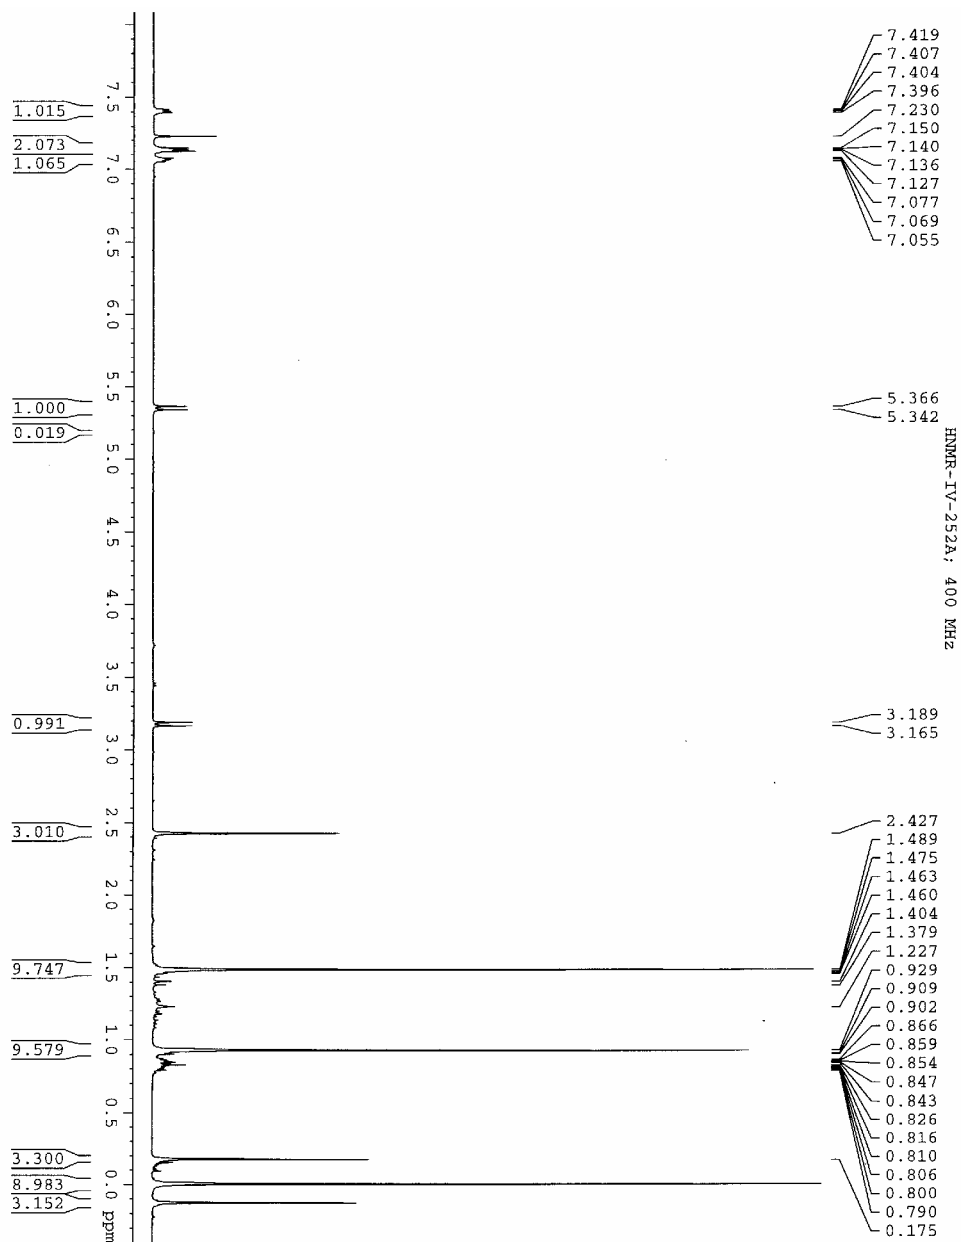

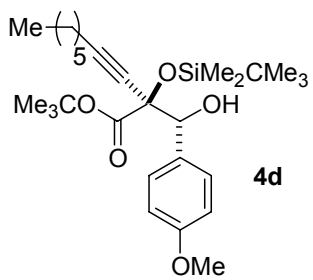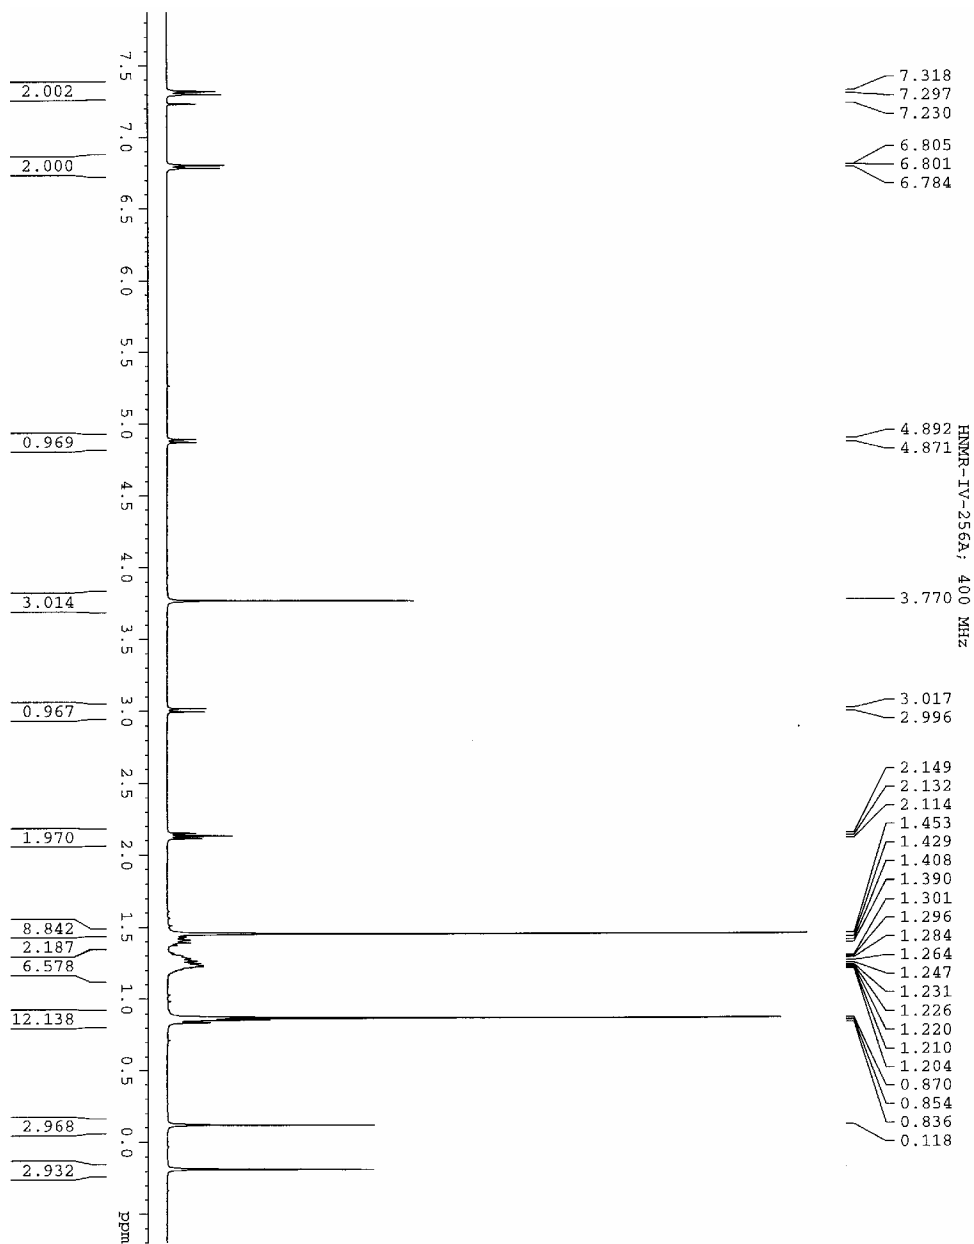

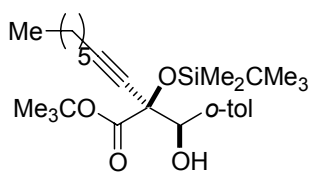

4e

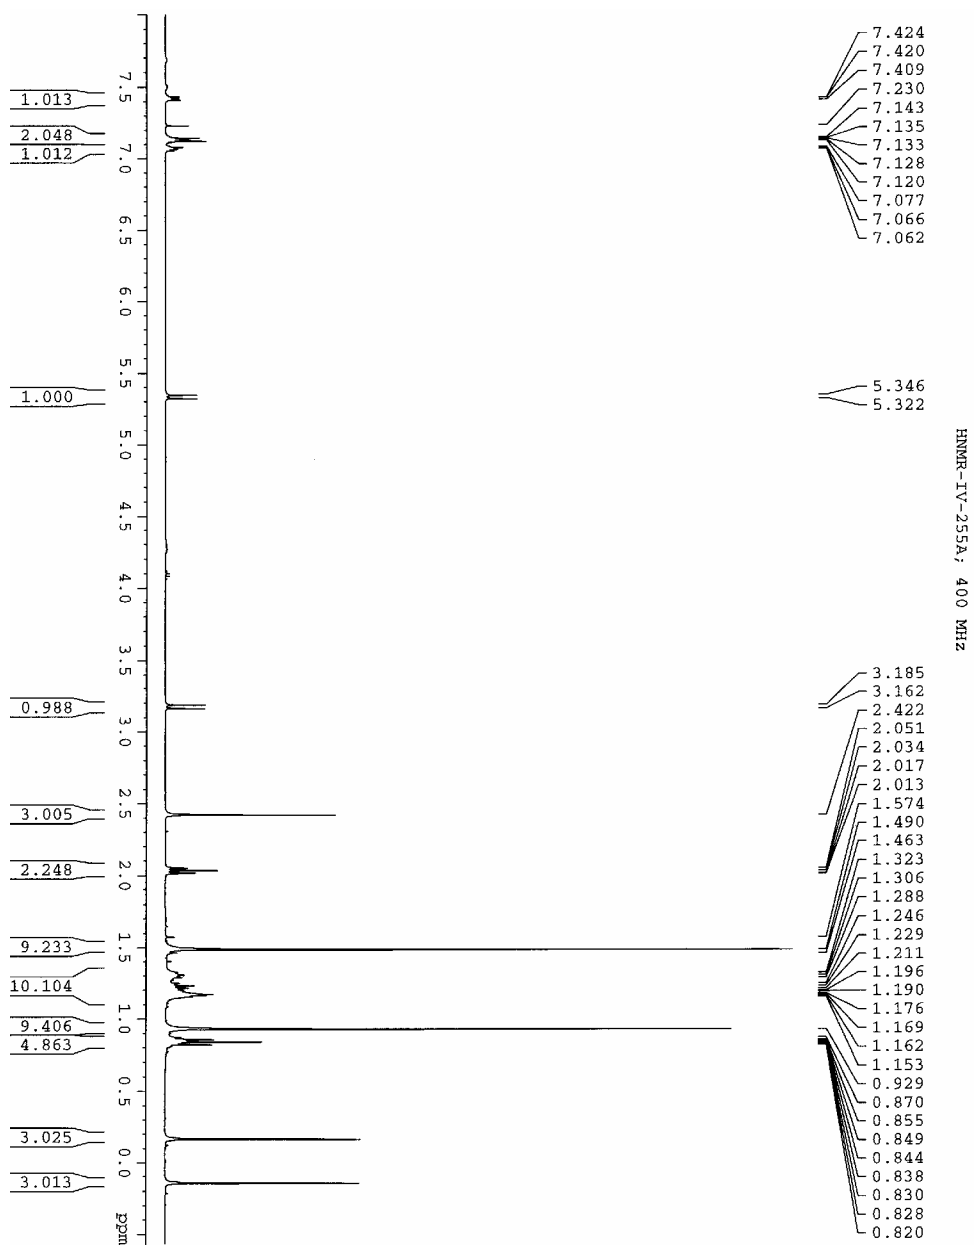

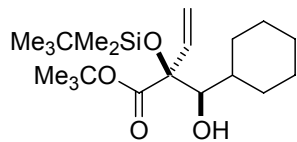

8

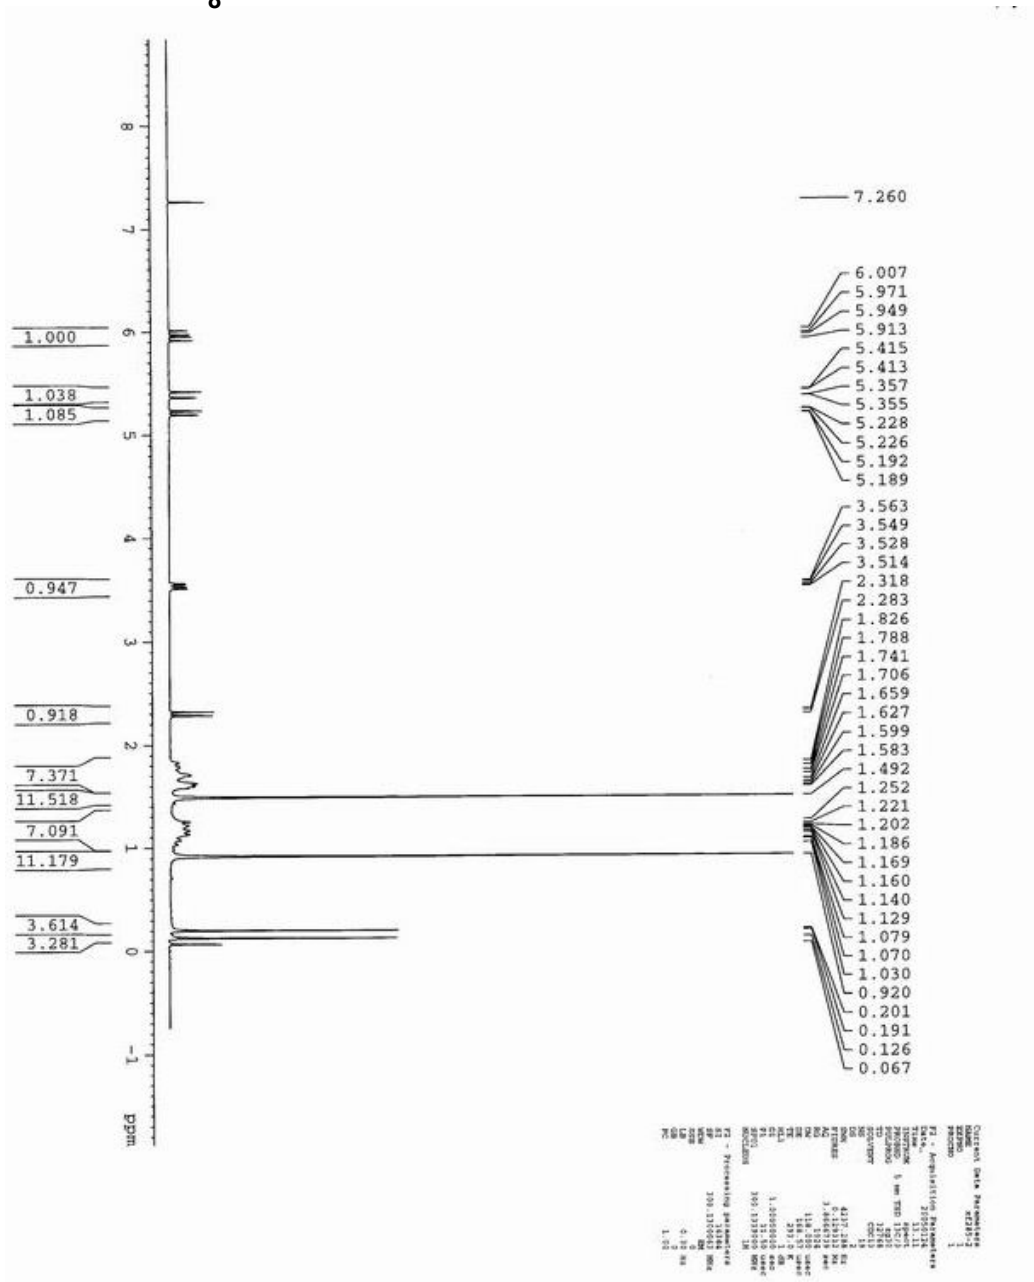

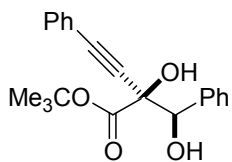

9

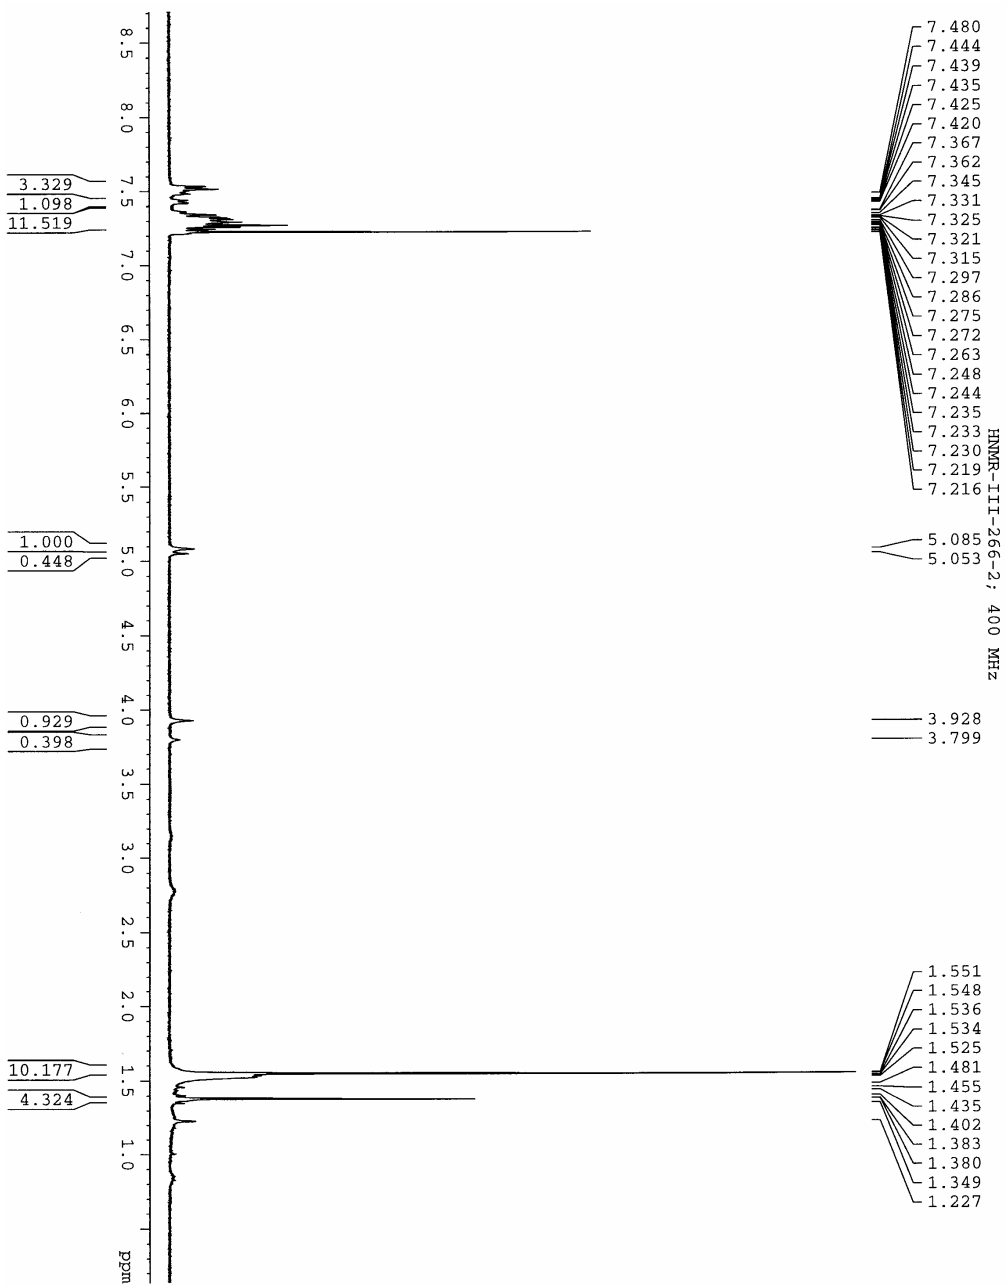



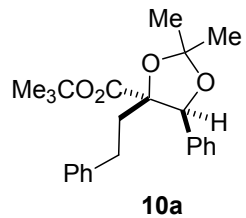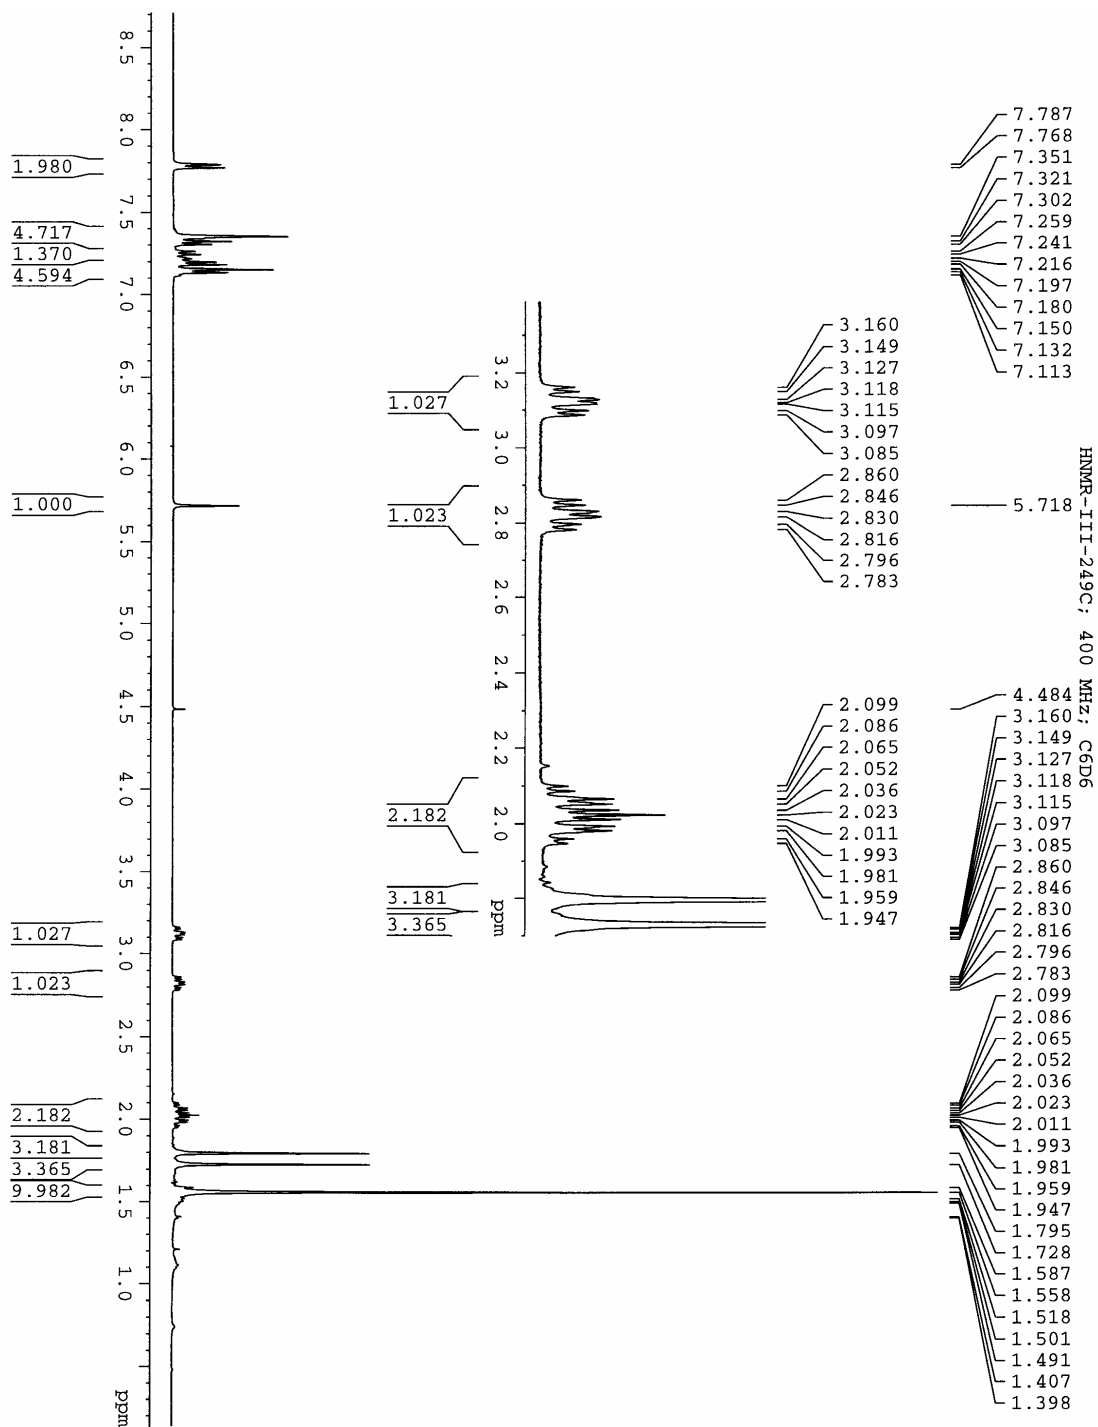

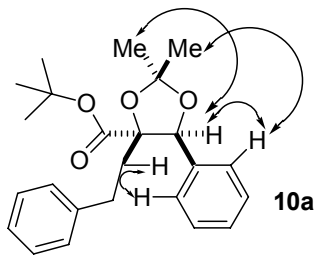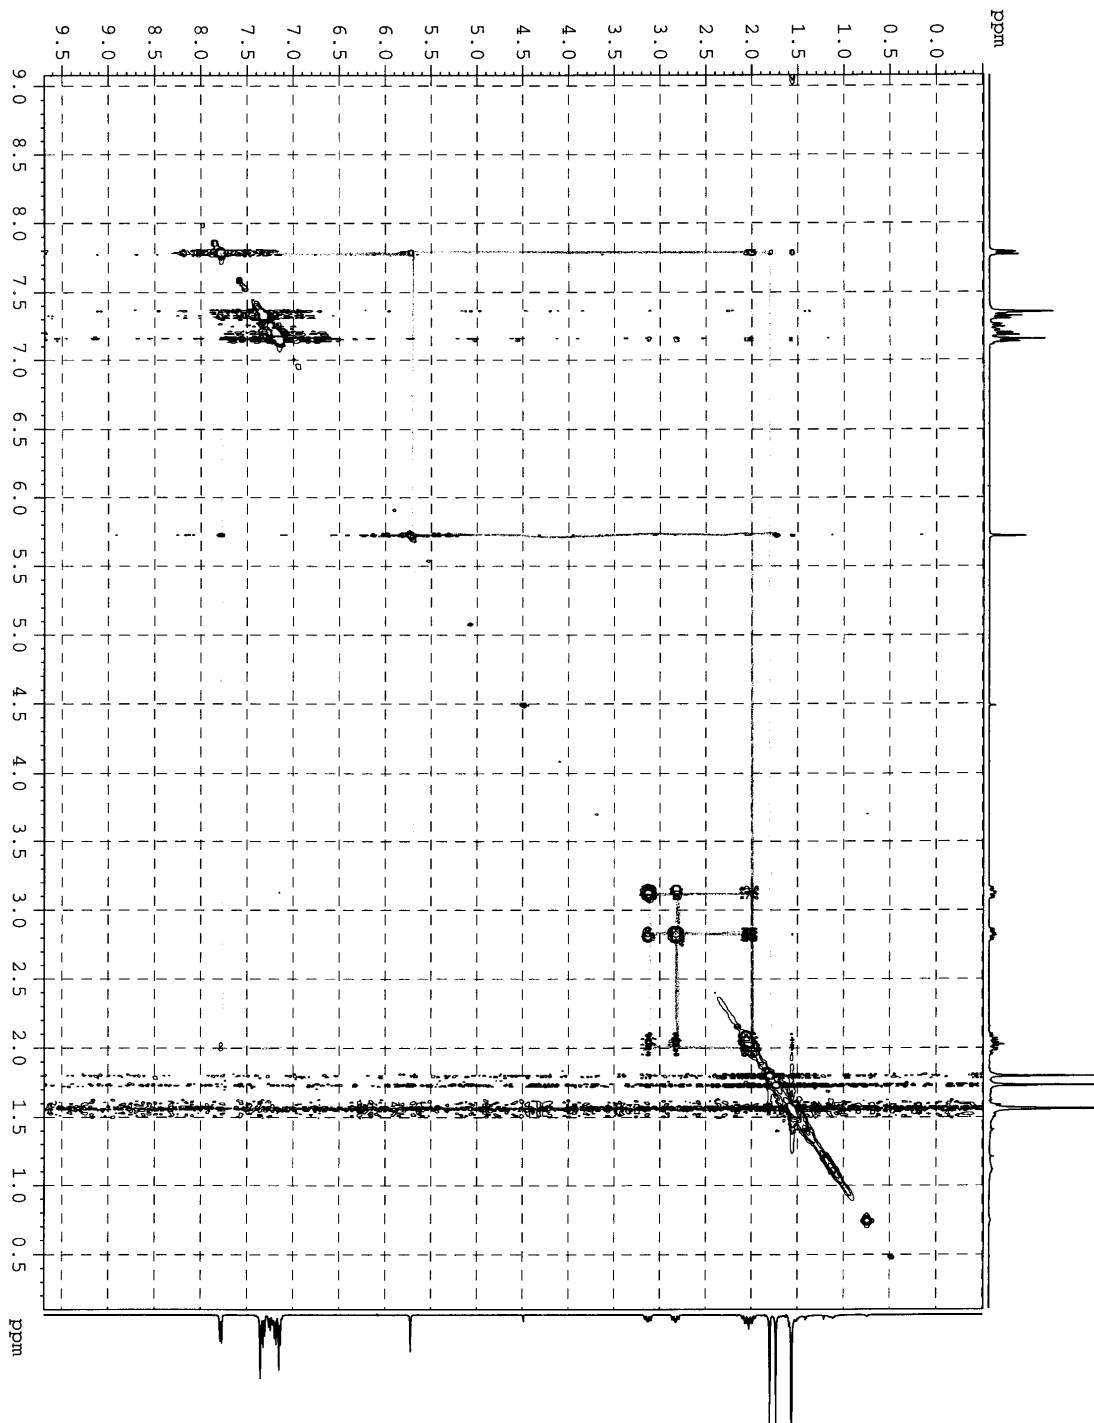

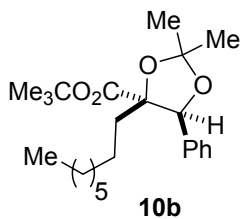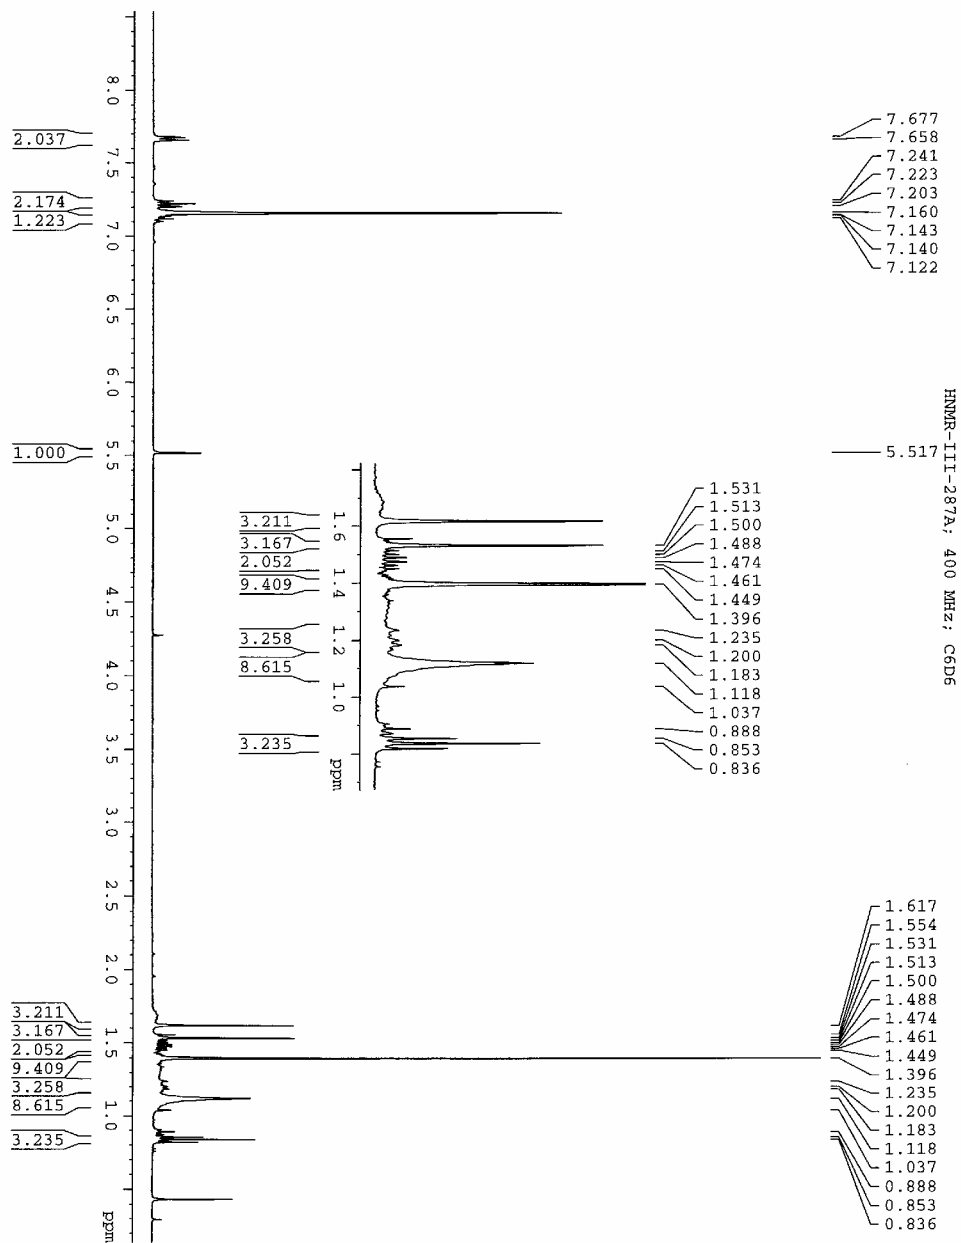

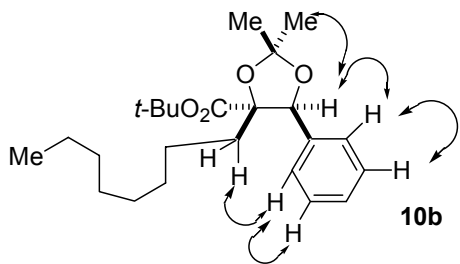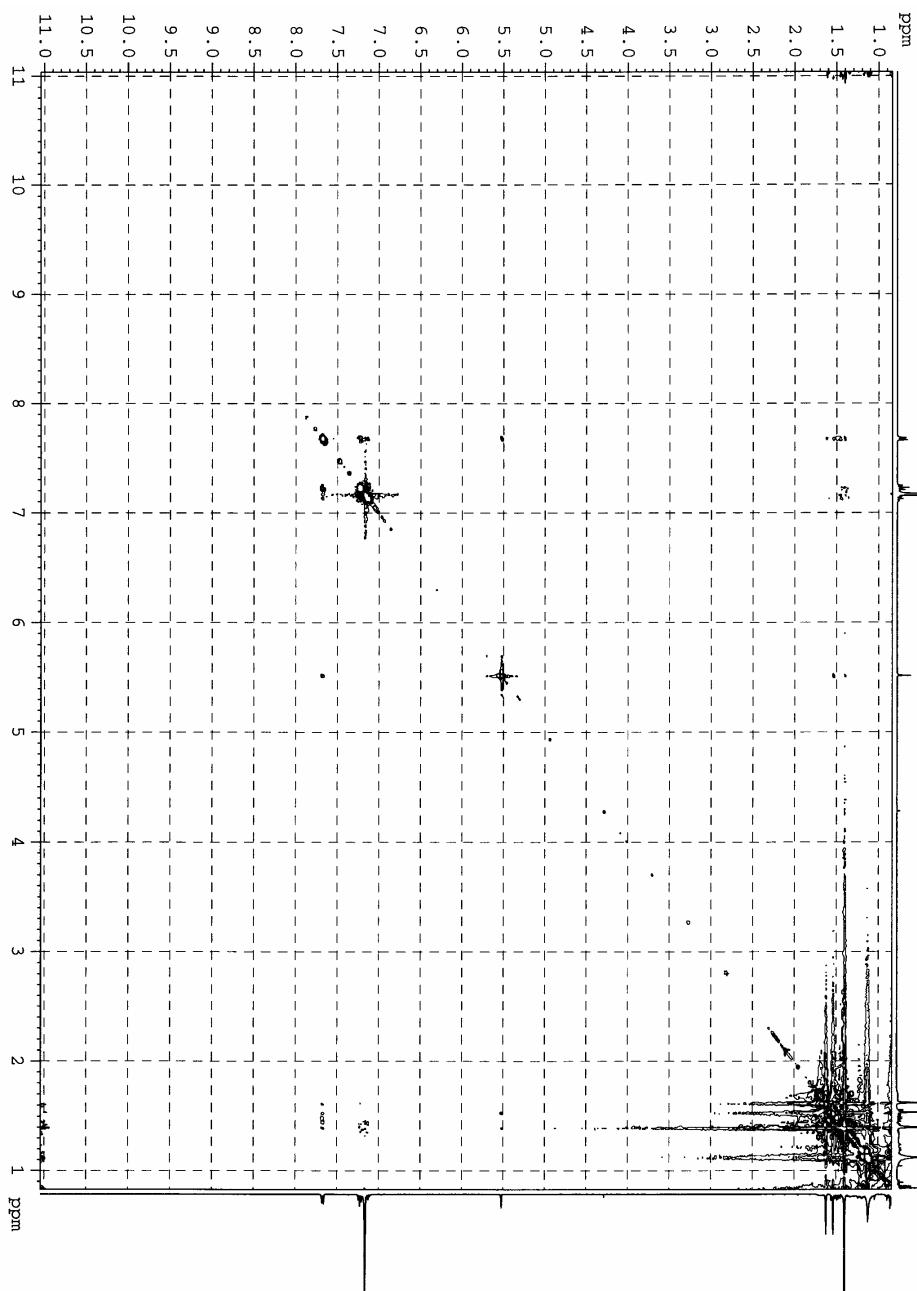

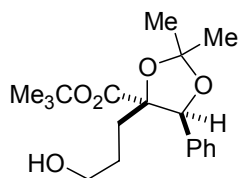

10c

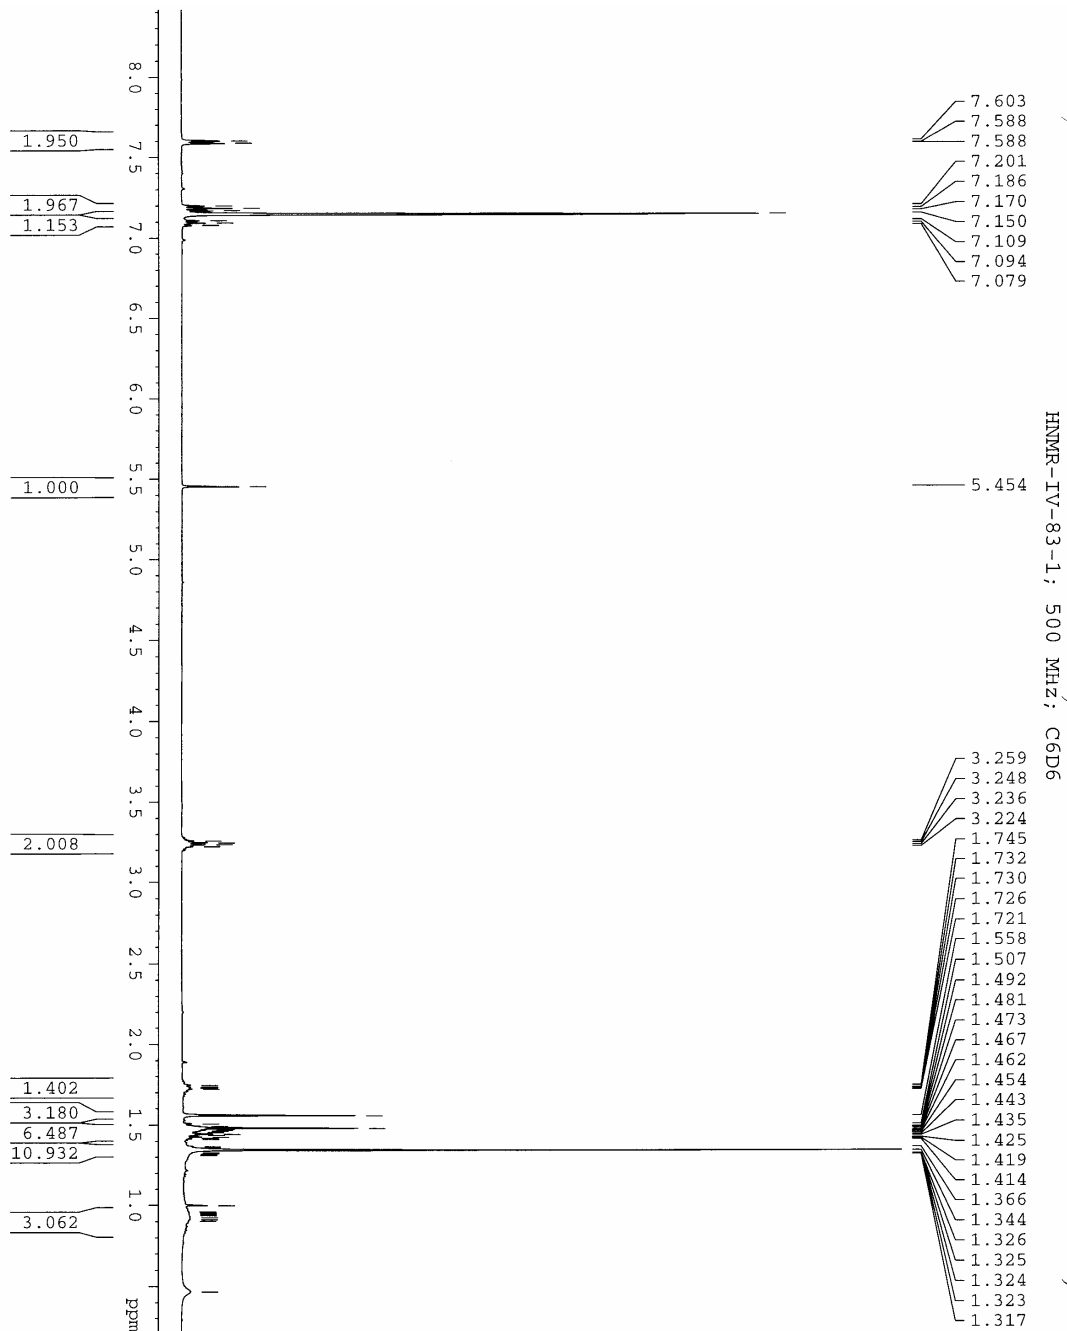

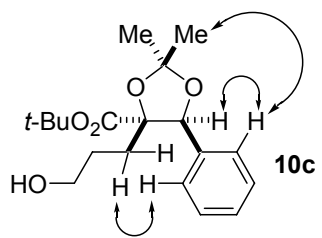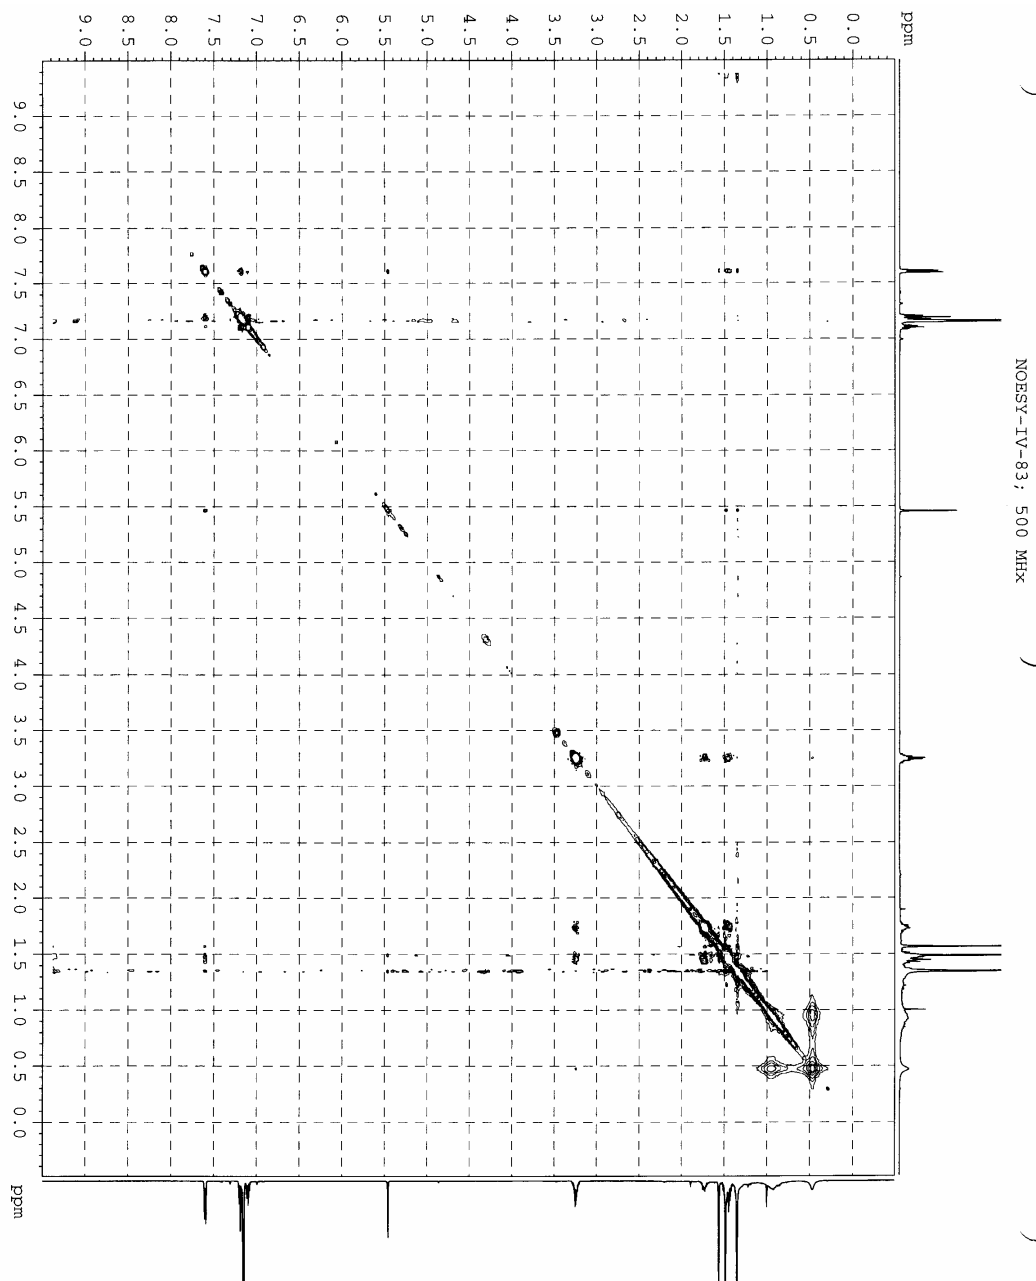

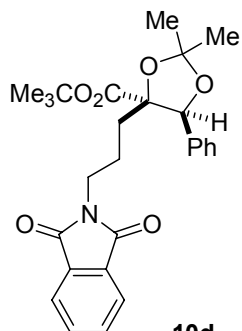

**10d**

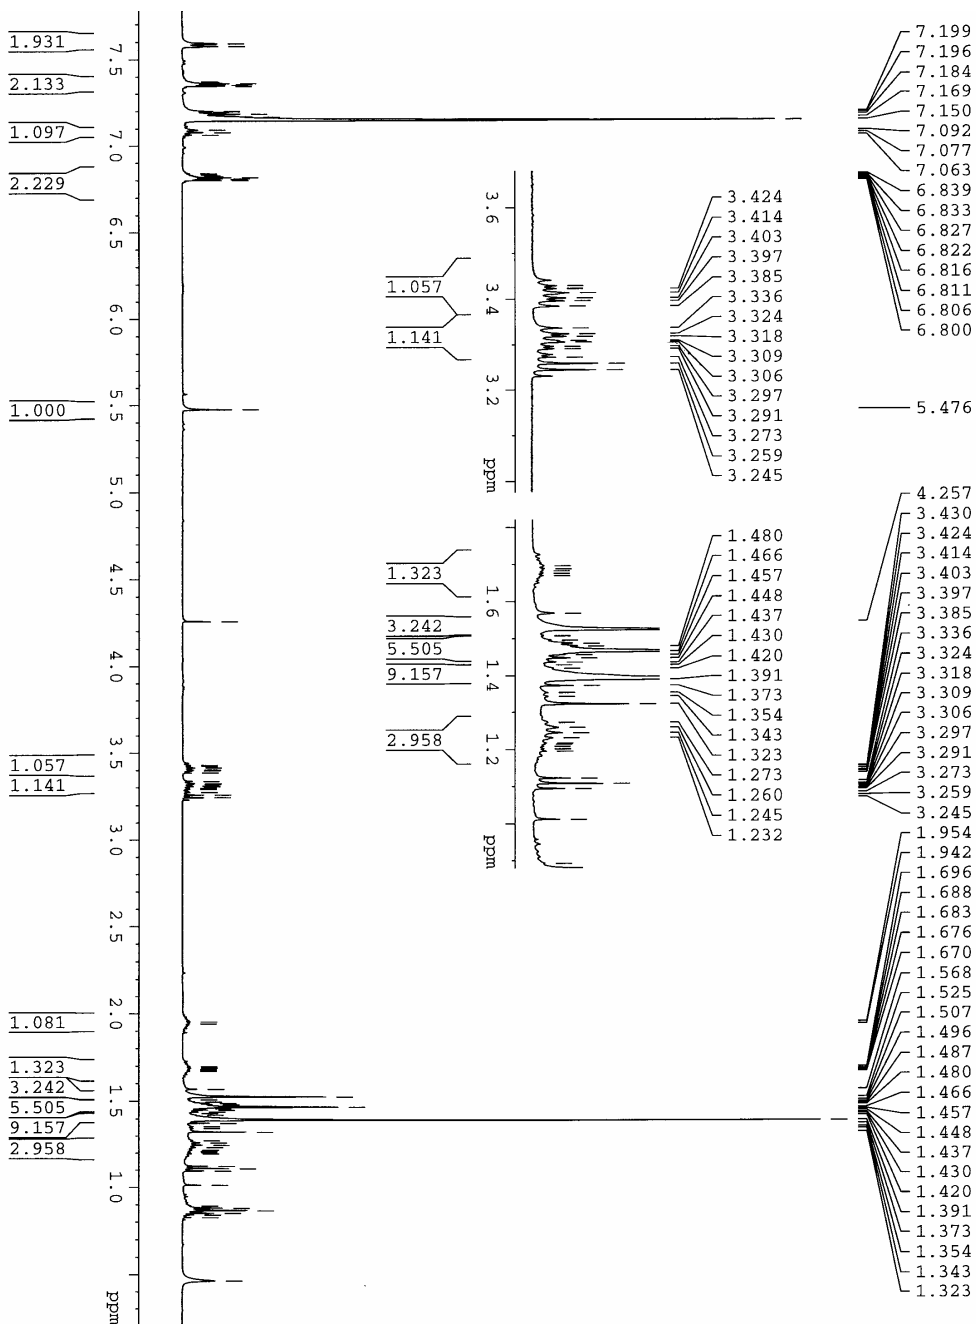

HNMR-IV-115A; 500 MHz; C6D6

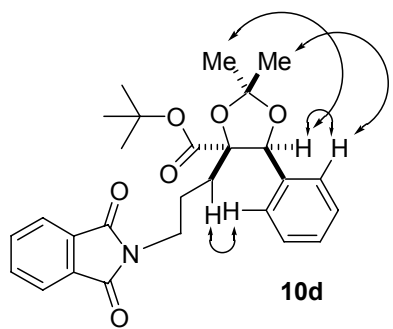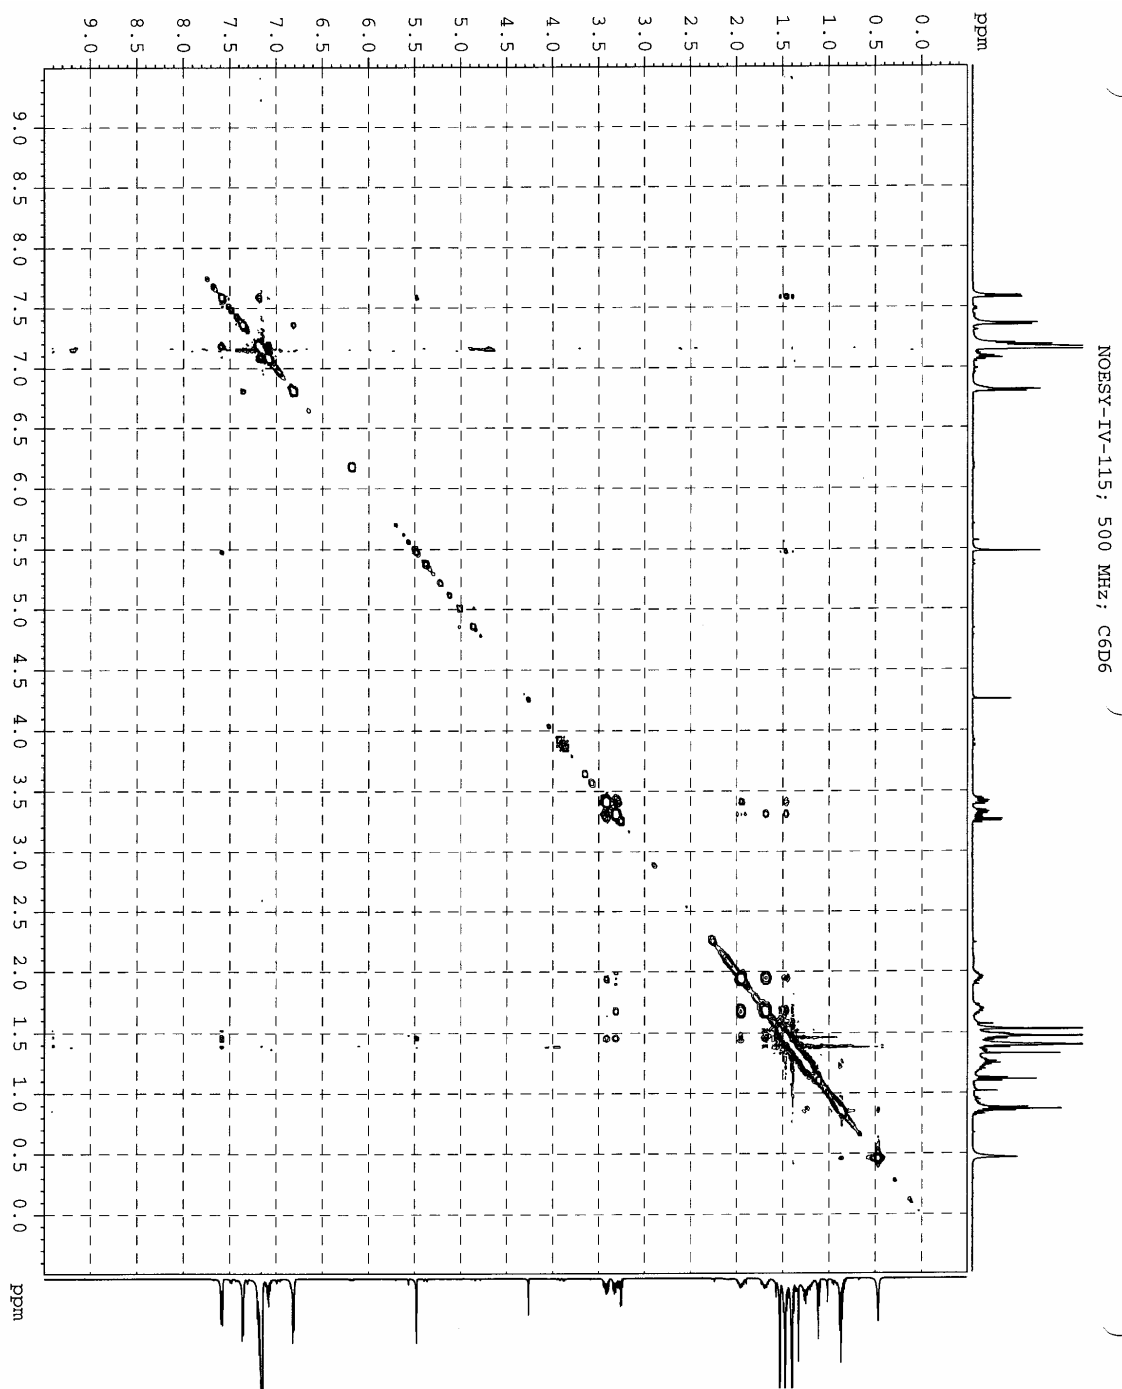



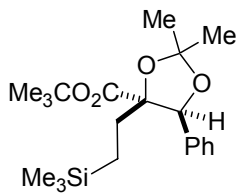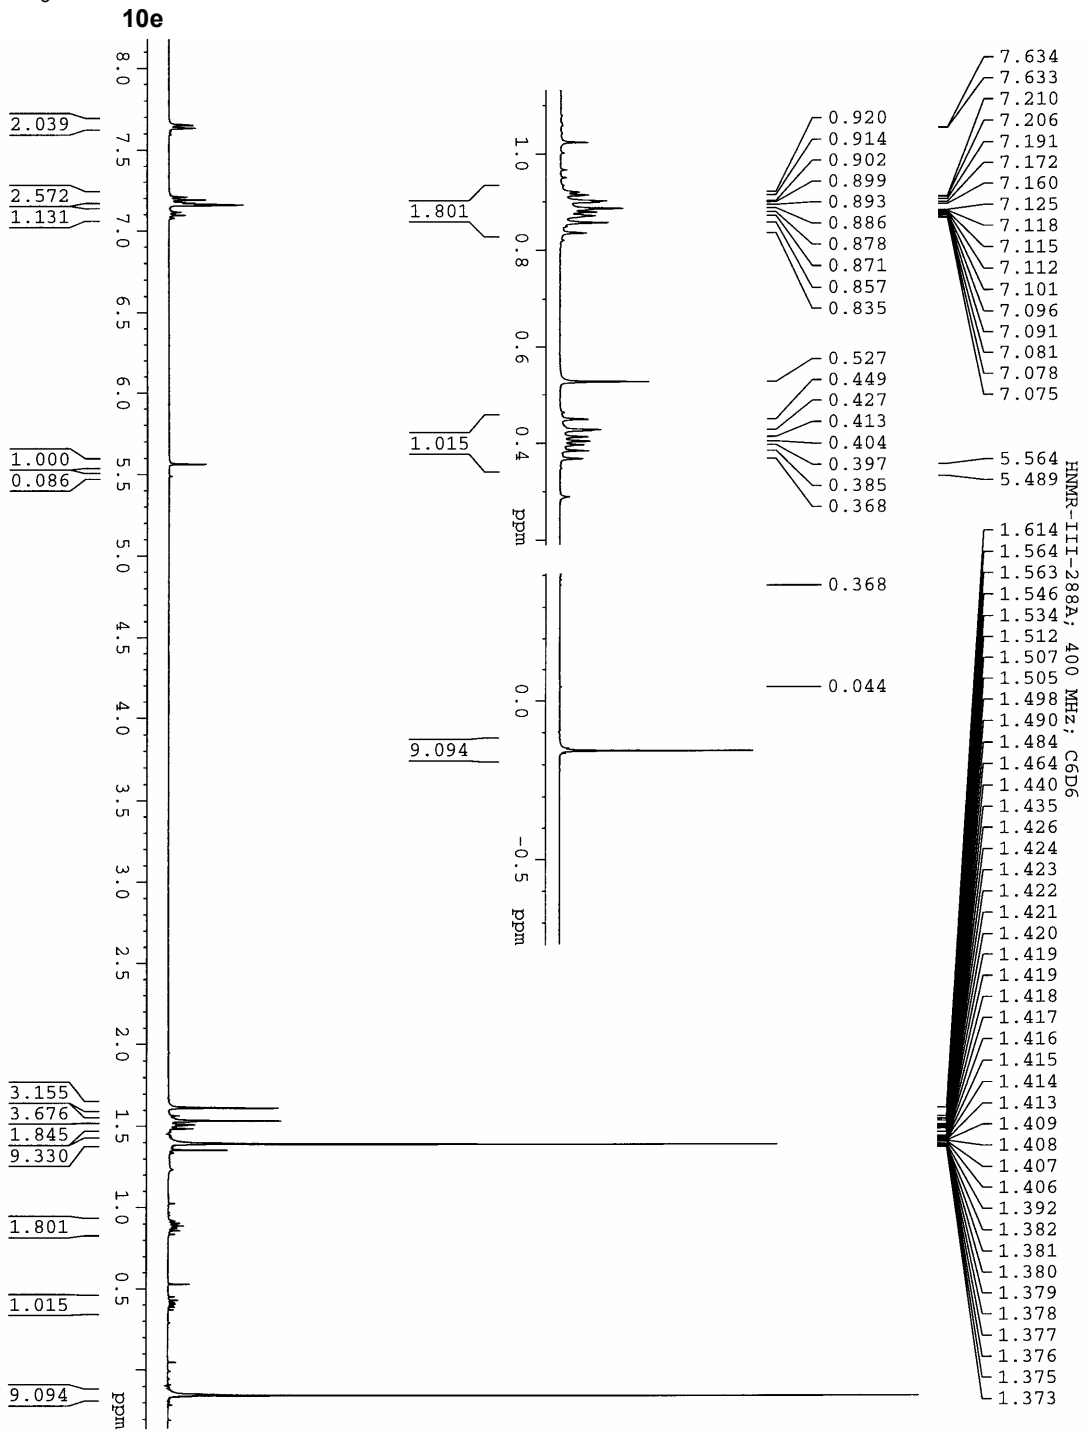

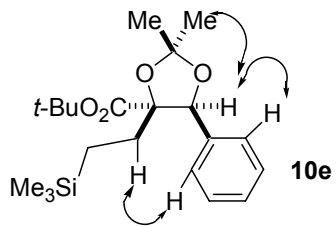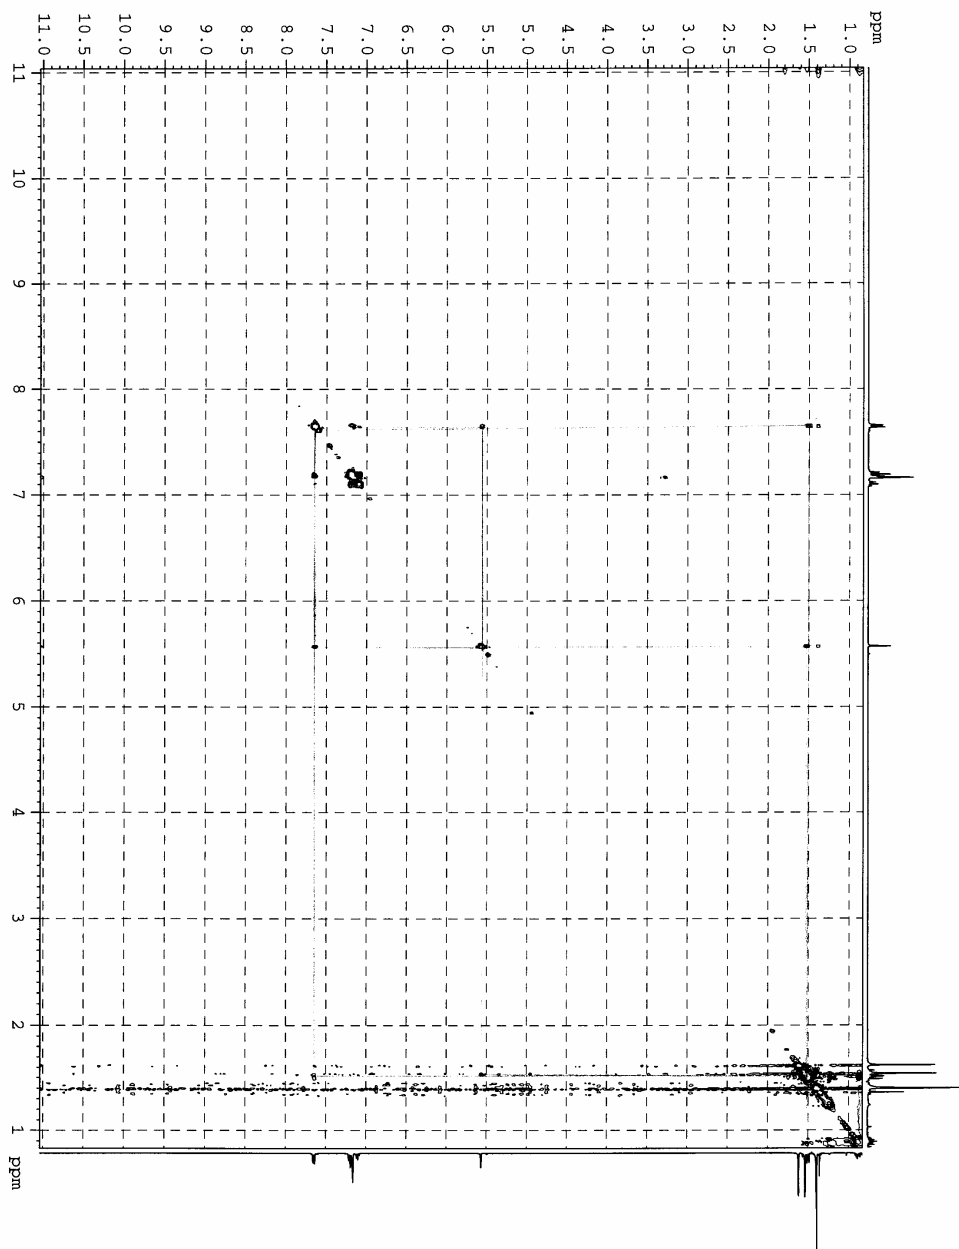

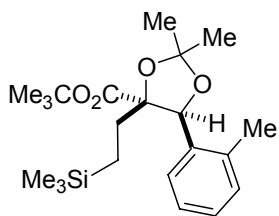

**10f**

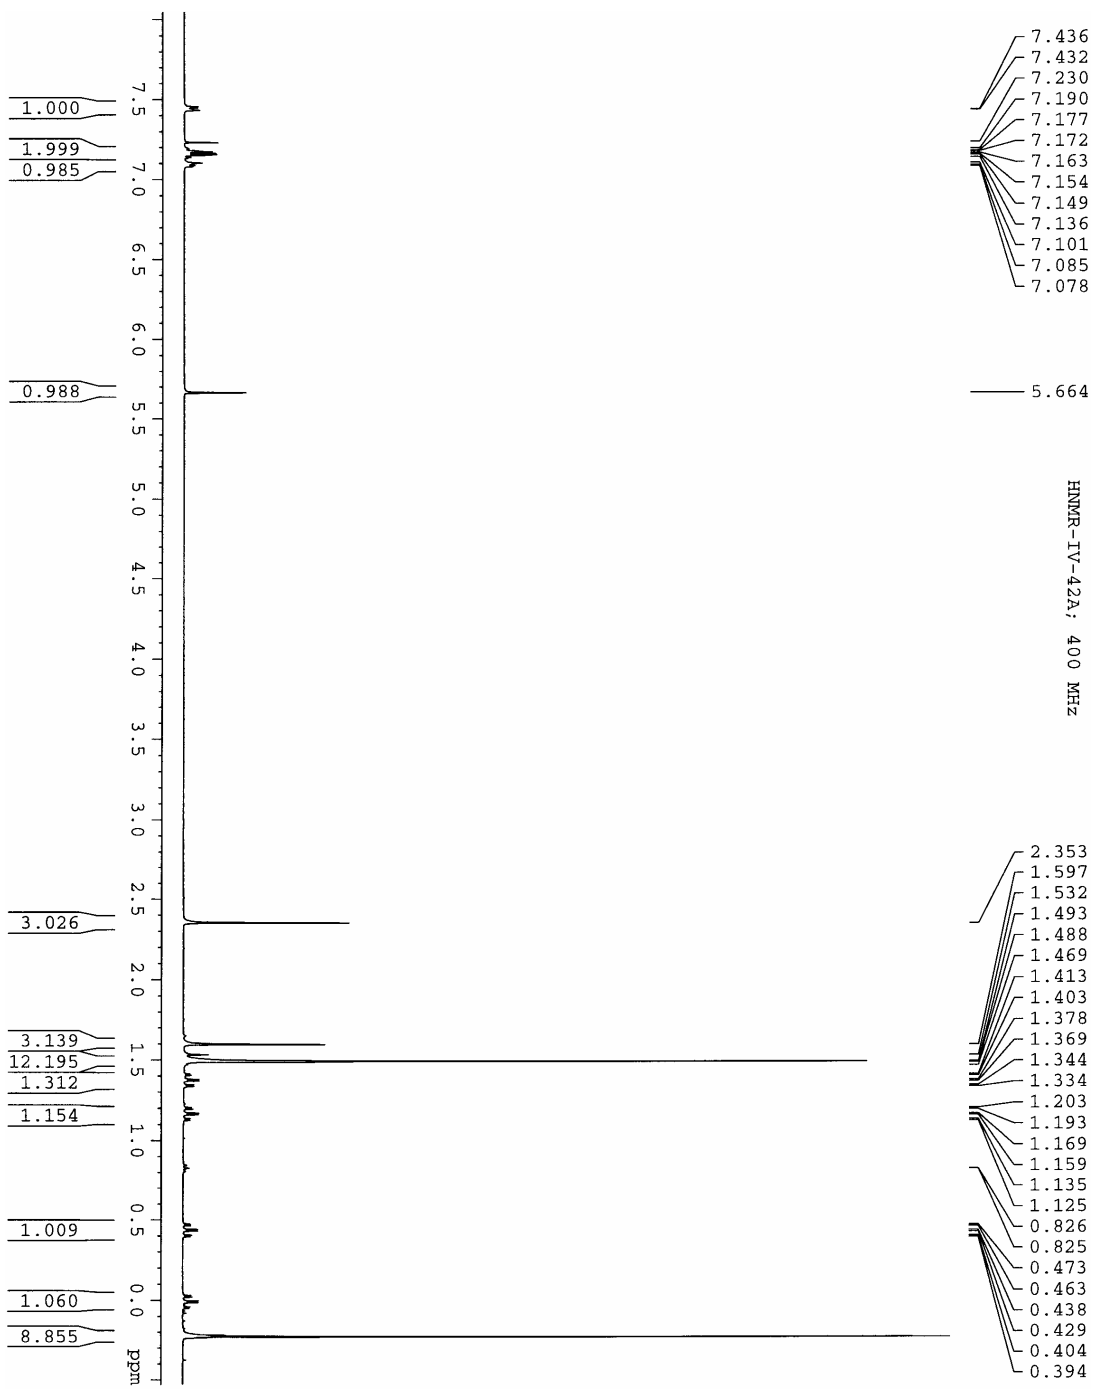

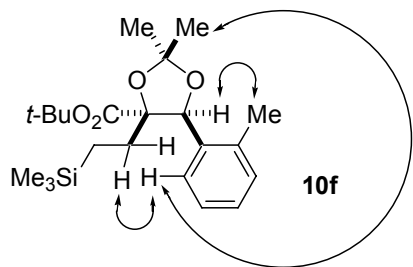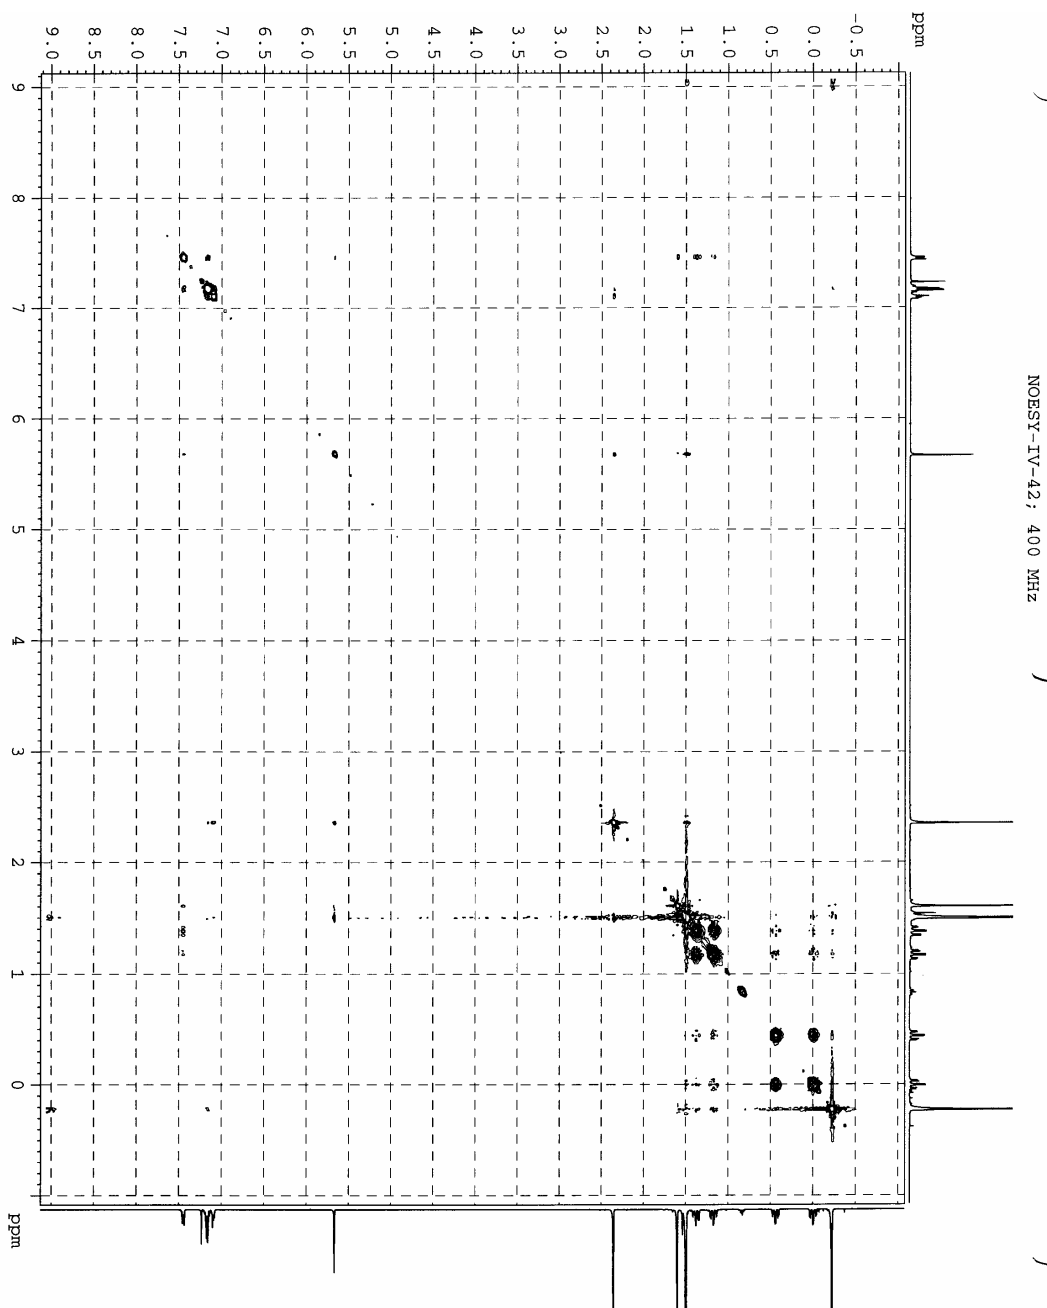

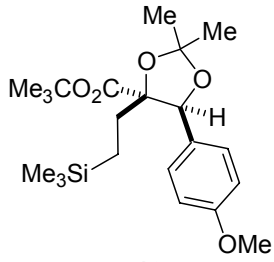

10g

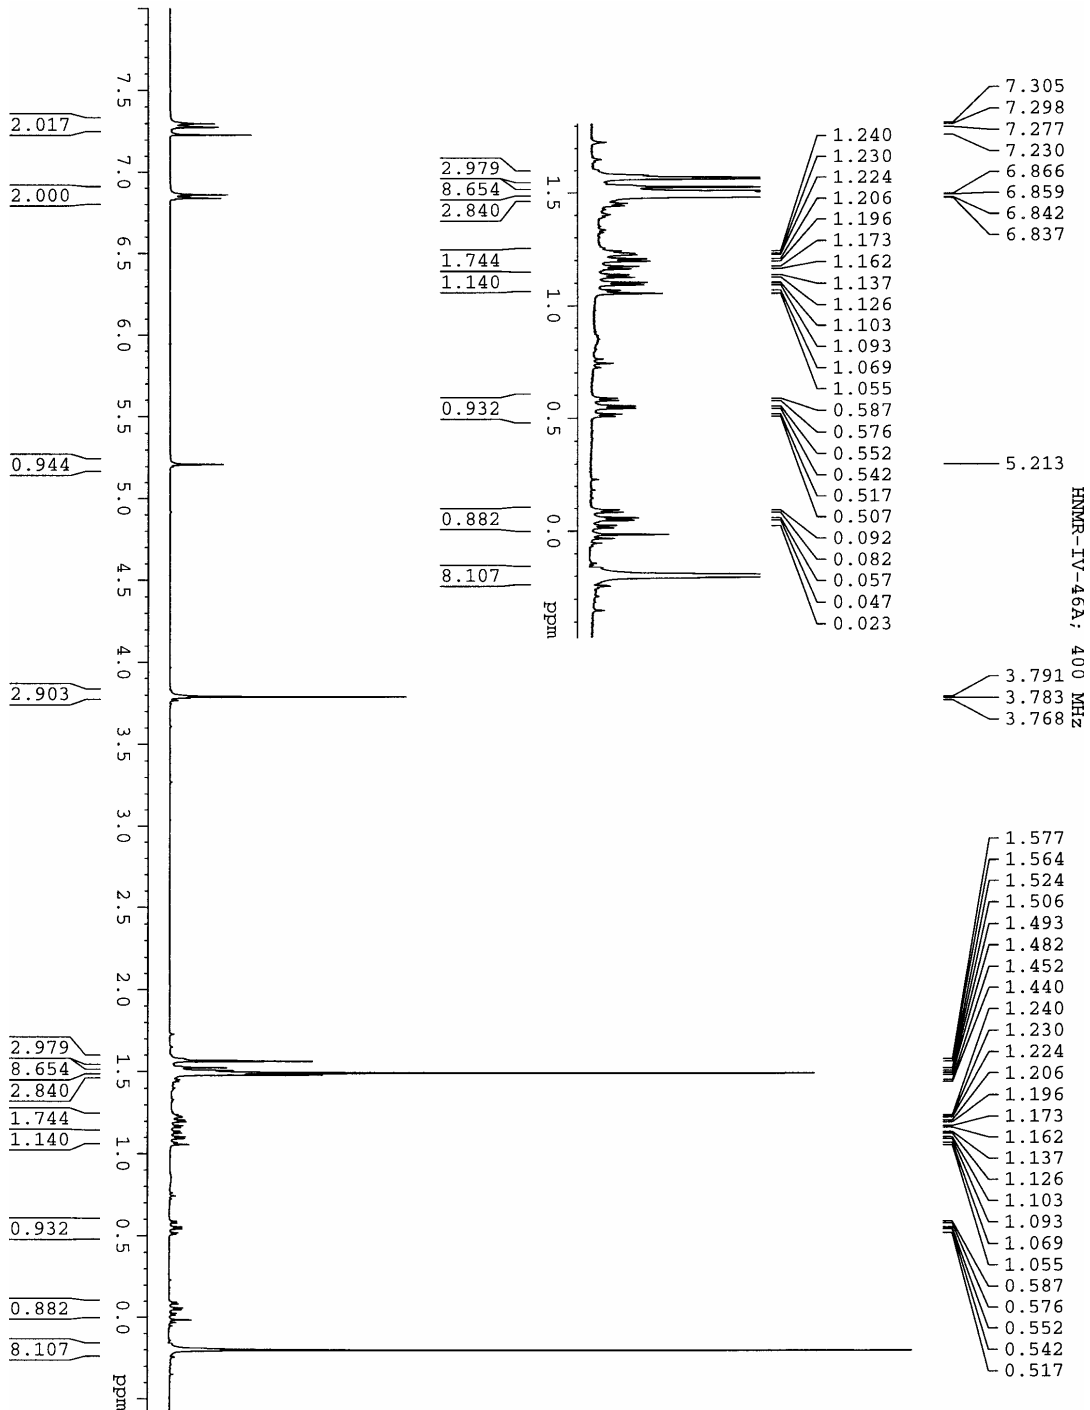

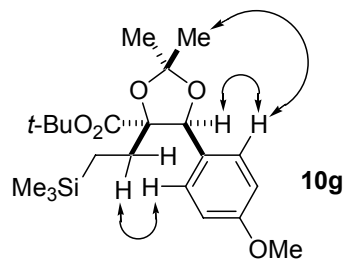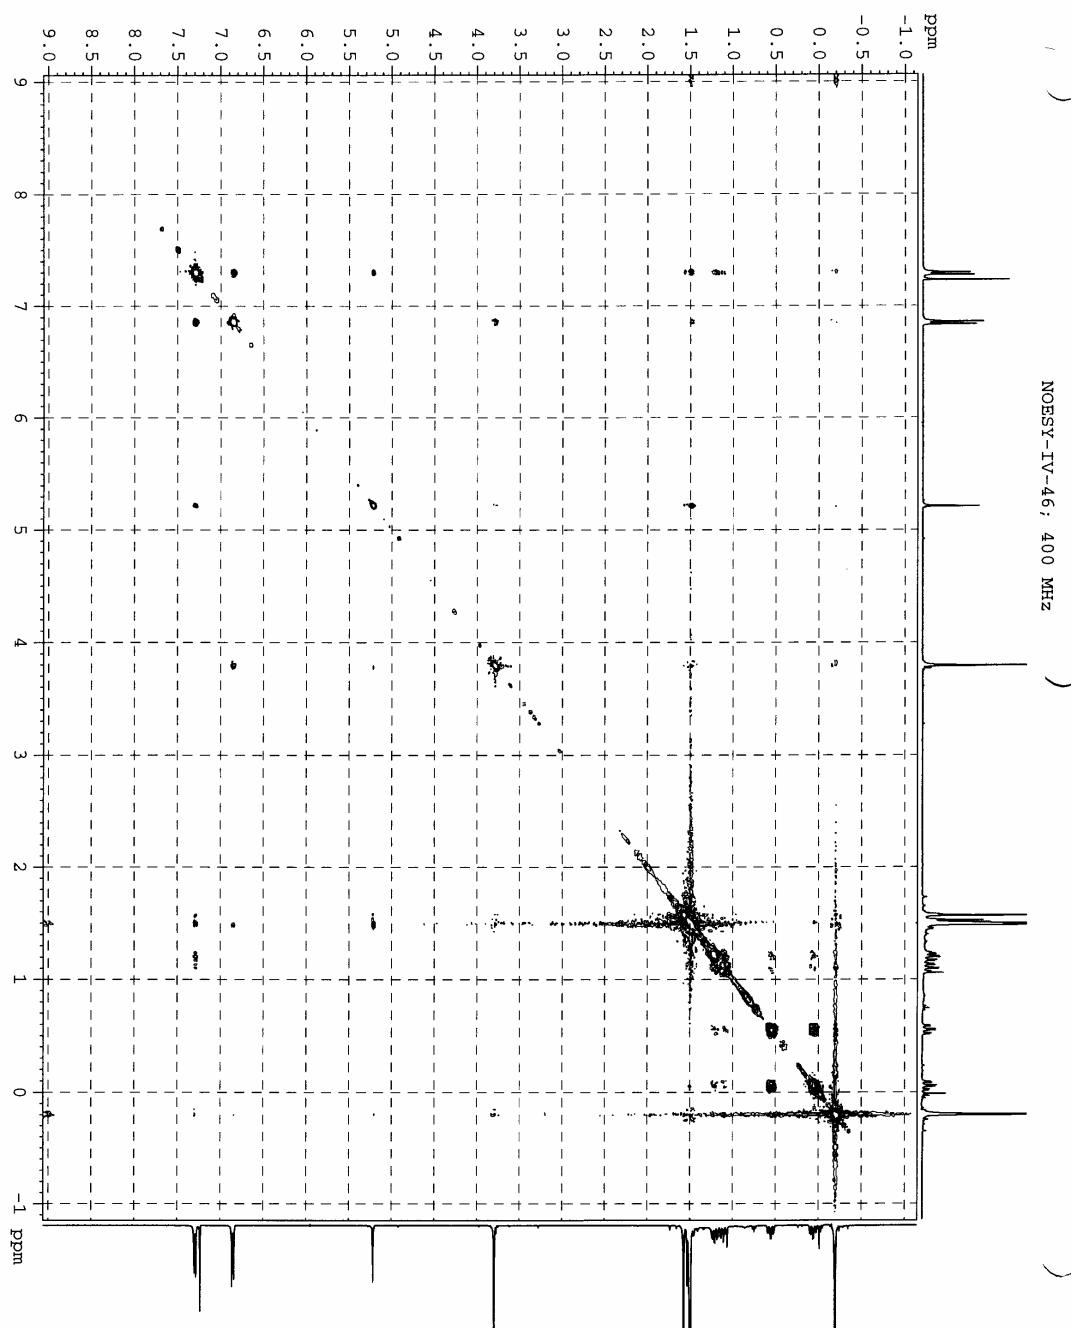

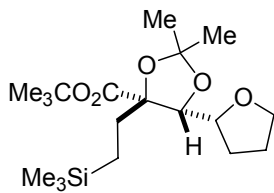

10i

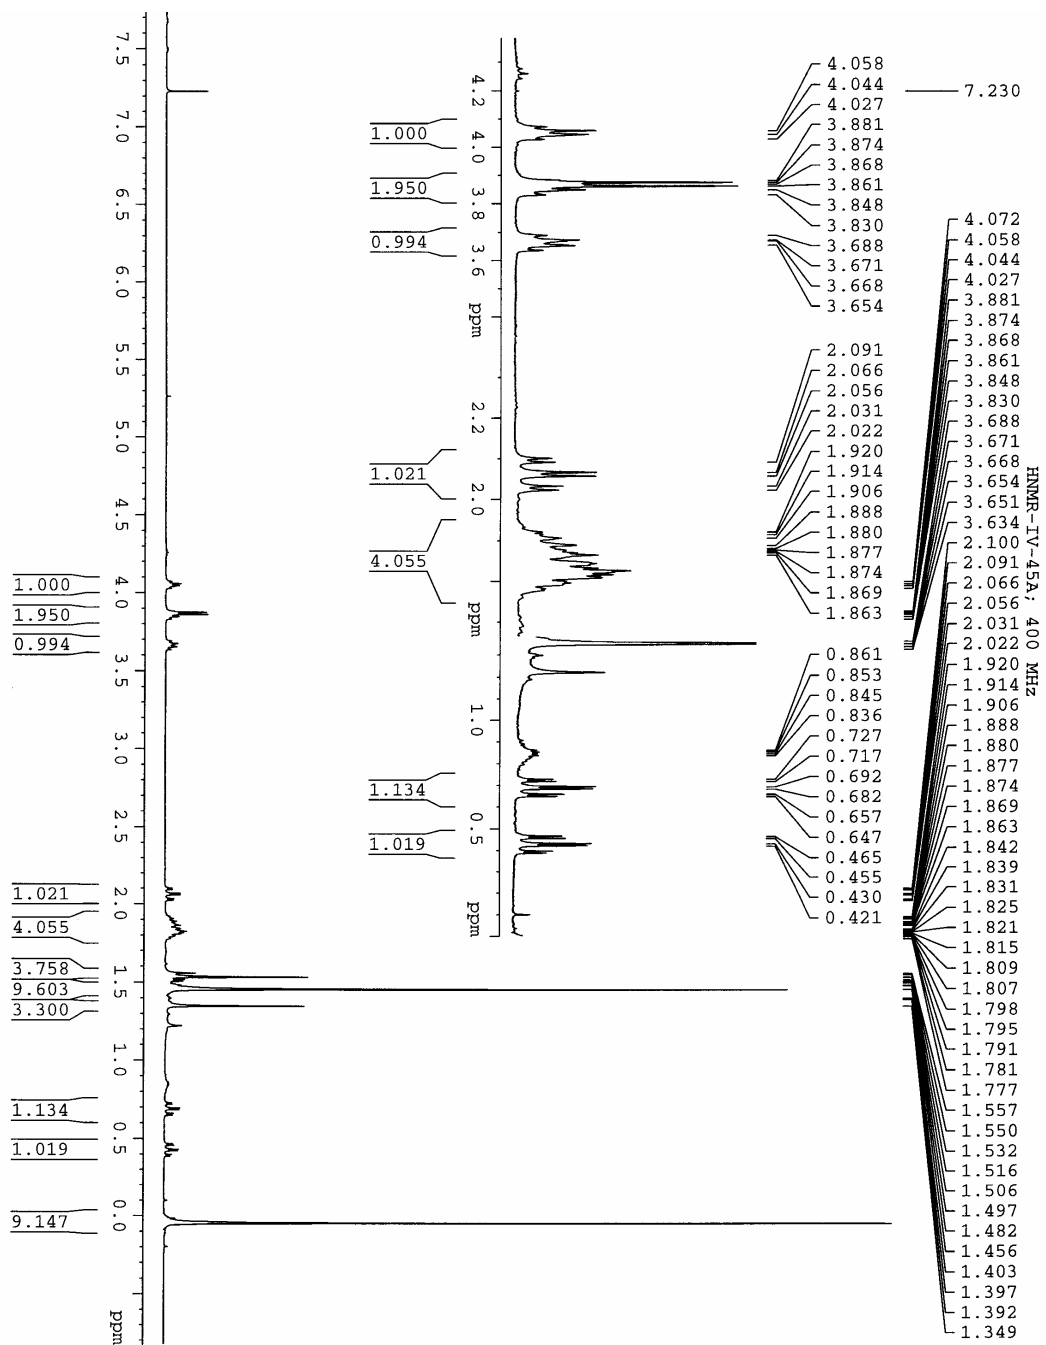

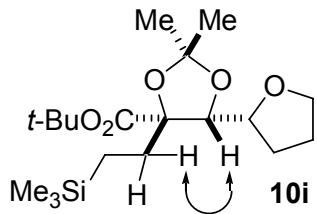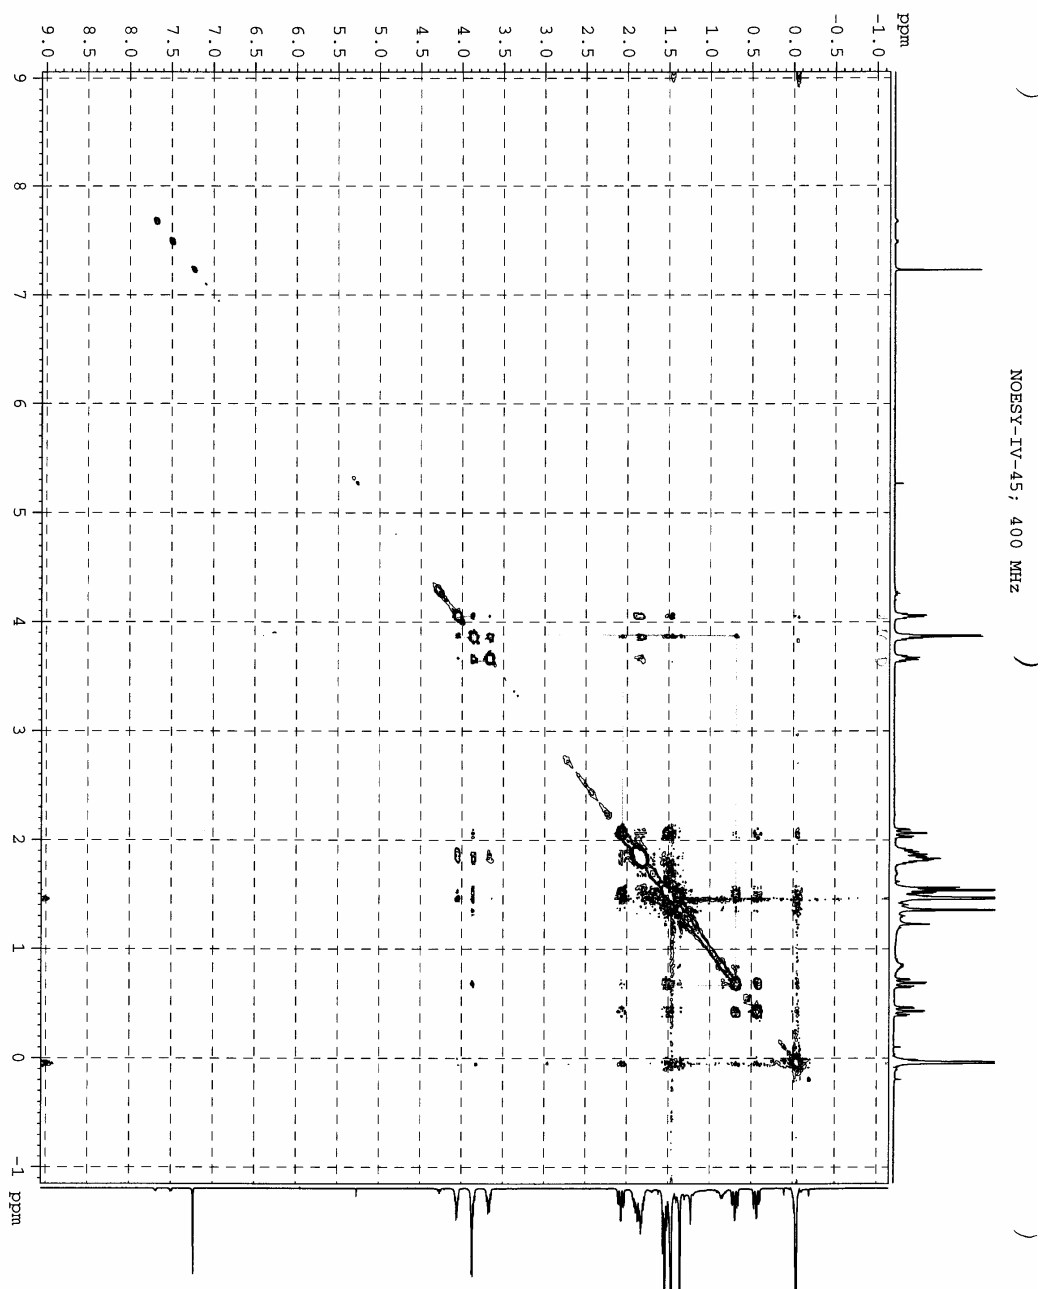



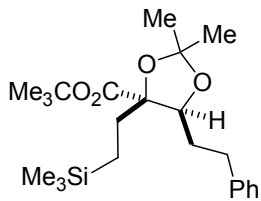

10j

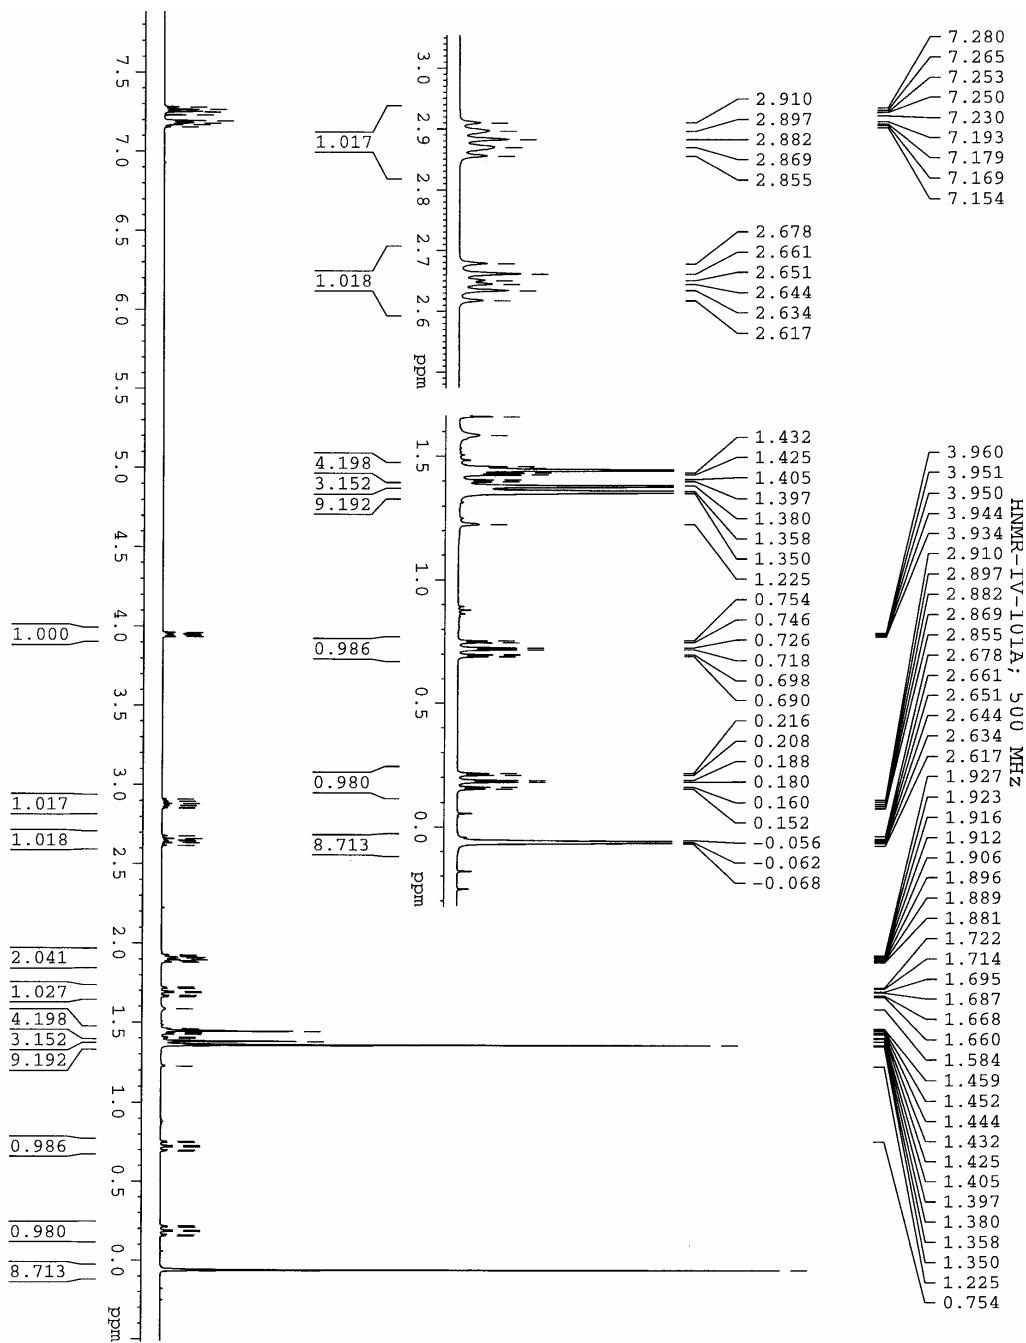

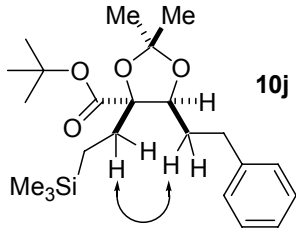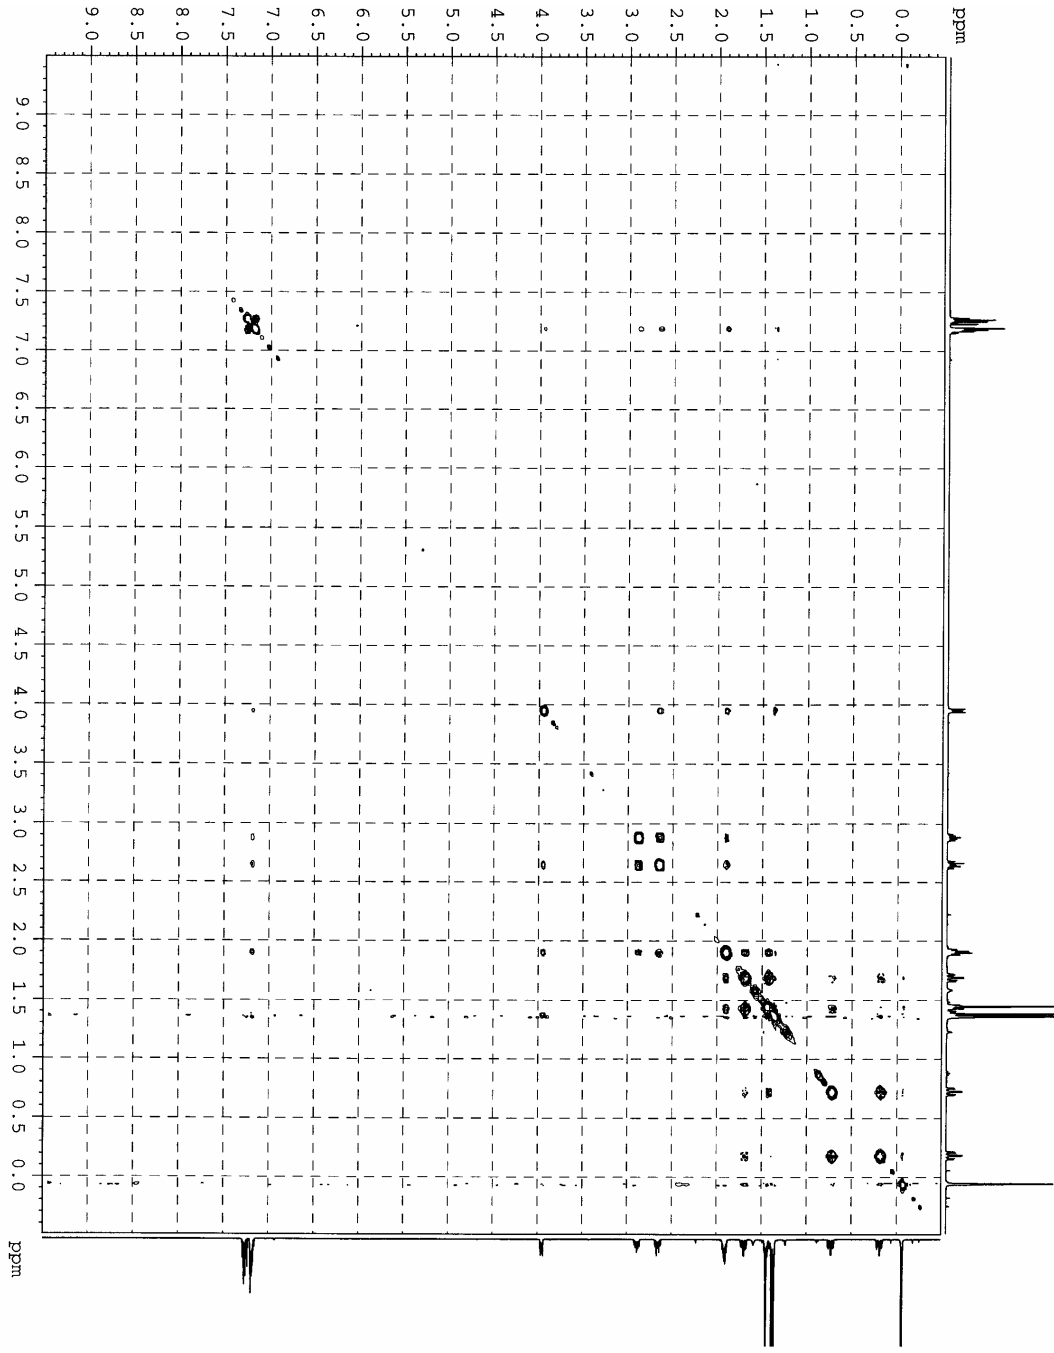

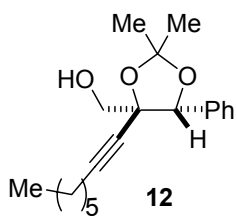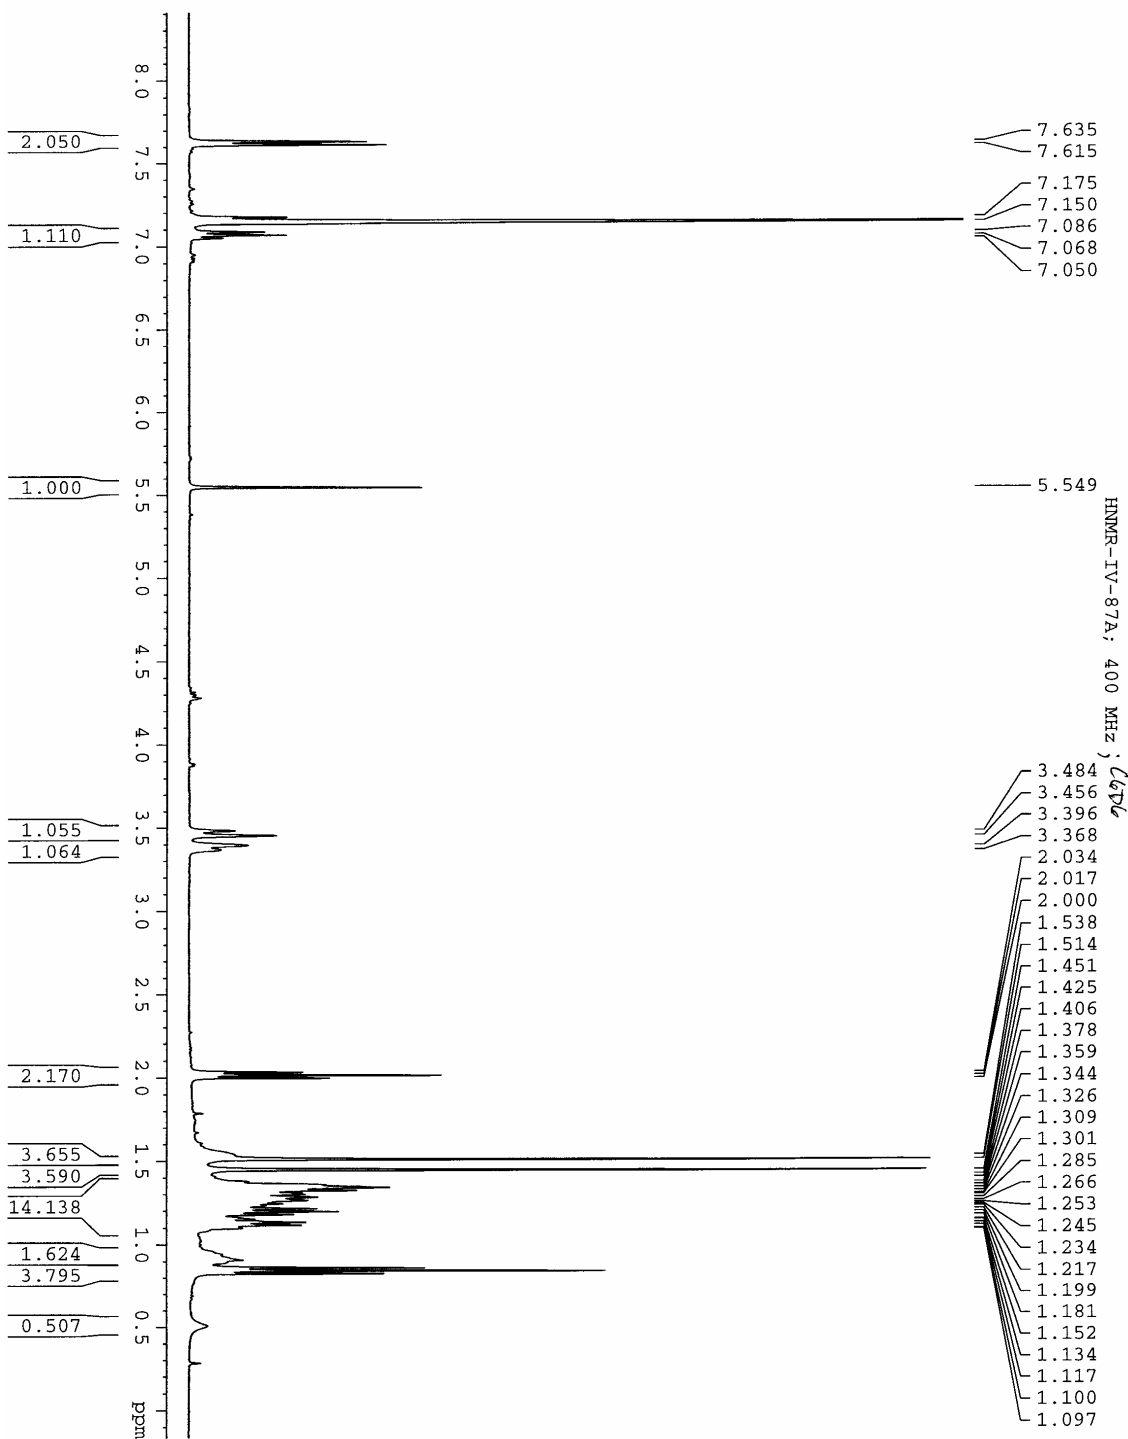

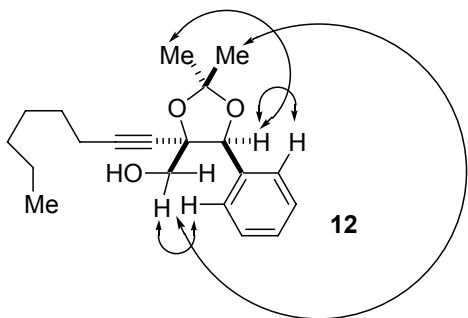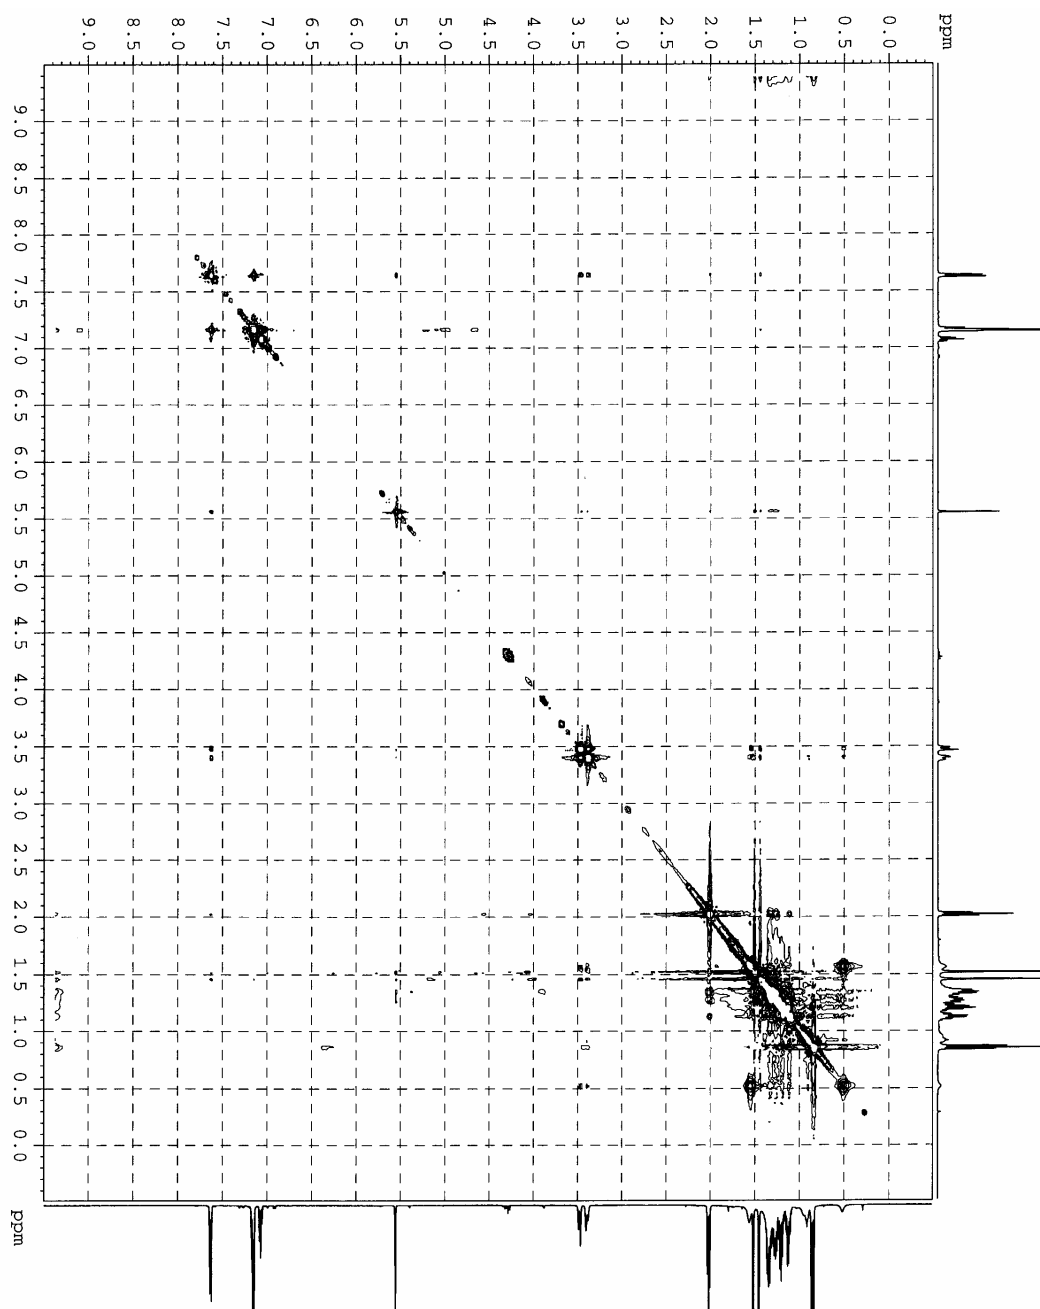

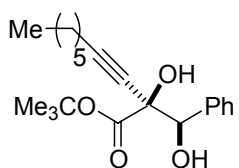

13

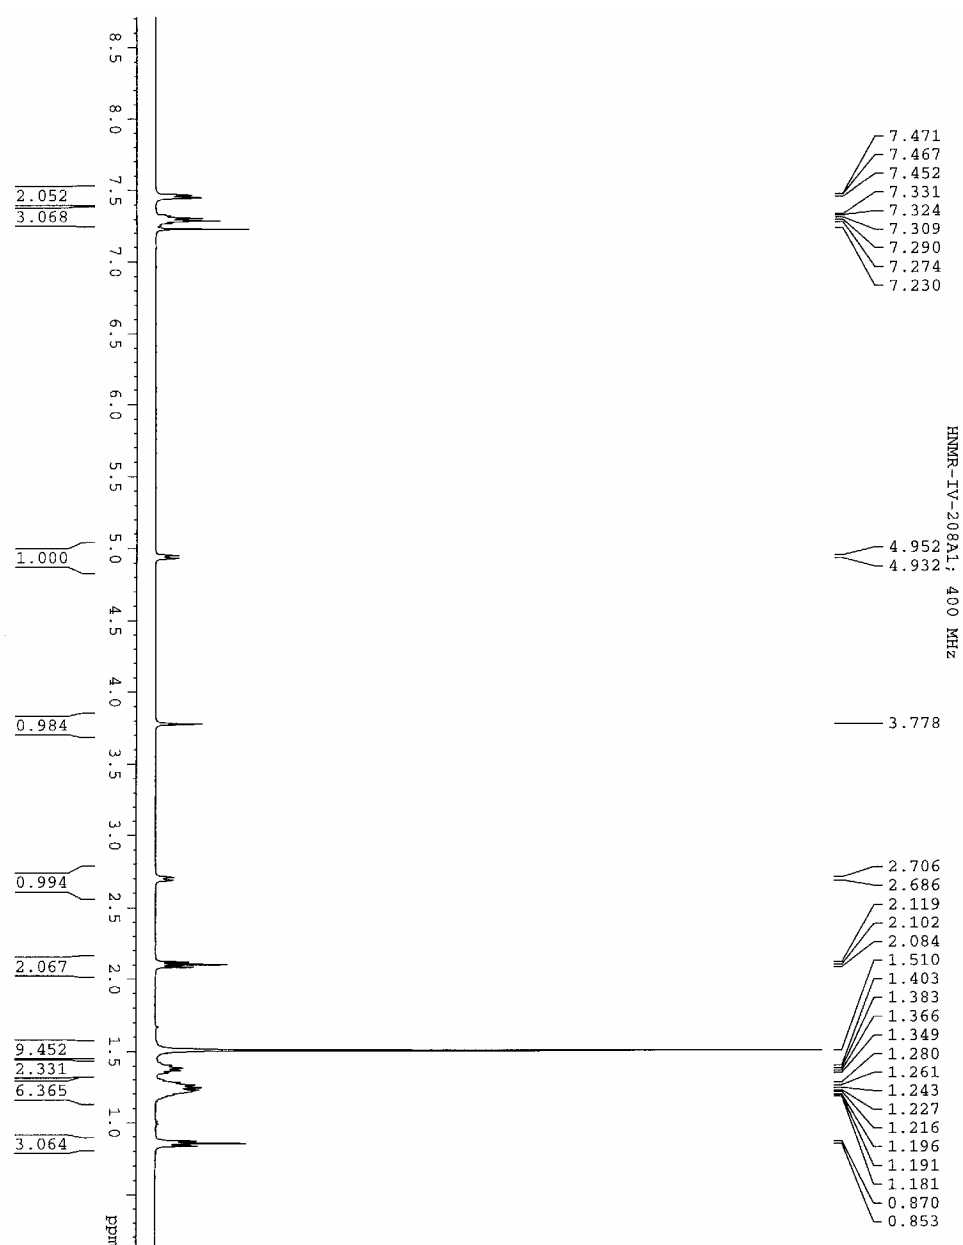



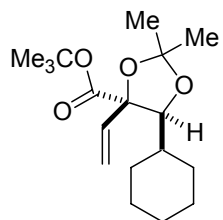

15

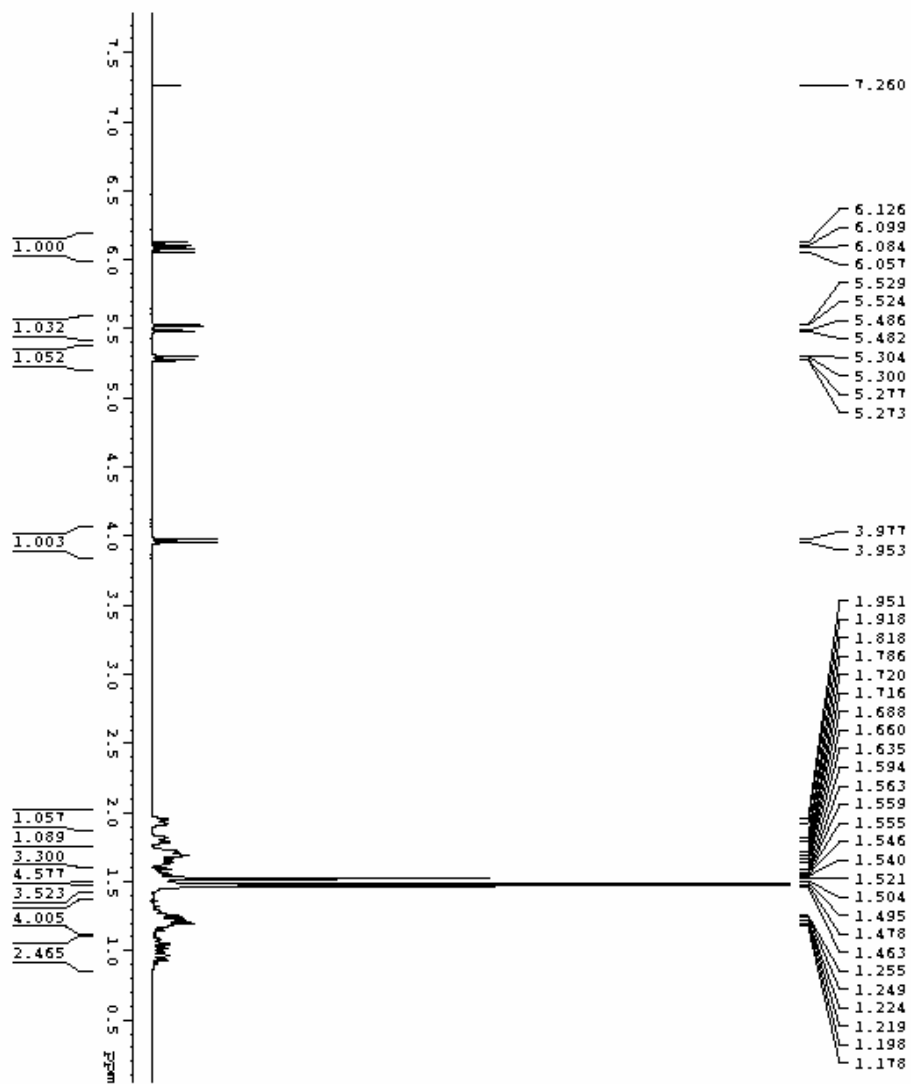

Current Data Parameters  
 Name: 15  
 Date\_Time: 20080228  
 File: 15\_01.f2  
 F2 - Acquisition Parameters  
 Date\_Time: 20080228 16:04:00  
 File: 15\_01.f2  
 F2 - Processing parameters  
 Date\_Time: 20080228 16:04:00  
 File: 15\_01.f2  
 F2 - Reference parameters  
 Name: 15  
 Date\_Time: 20080228 16:04:00  
 File: 15\_01.f2  
 F2 - Integration parameters  
 Name: 15  
 Date\_Time: 20080228 16:04:00  
 File: 15\_01.f2  
 F2 - Peak list  
 Name: 15  
 Date\_Time: 20080228 16:04:00  
 File: 15\_01.f2  
 F2 - Integration list  
 Name: 15  
 Date\_Time: 20080228 16:04:00  
 File: 15\_01.f2
